# Supplementary material for: NHCs as Neutral Donors towards Polyphosphorus Complexes
Source: PubMed Central journal article supplement — Chemistry. 2020 Oct 29;26(69):16251–5. doi: 10.1002/chem.202003393 (PMC7756228; doi:10.1002/chem.202003393), 2020-10-29
Supplement: CHEM-26-16251-s001.pdf [file CHEM-26-16251-s001.pdf]

# Chemistry–A European Journal

Supporting Information

## **NHCs as Neutral Donors towards Polyphosphorus Complexes**

Felix Riedlberger,<sup>[a]</sup> Stefano Todisco,<sup>[b]</sup> Piero Mastrorilli,<sup>[b]</sup> Alexey Y. Timoshkin,<sup>[c]</sup>  
Michael Seidl,<sup>[a]</sup> and Manfred Scheer\*<sup>[a]</sup>

Supporting Information  
©Wiley-VCH 2016  
69451 Weinheim, Germany

## **NHCs as neutral nucleophiles against $P_n$ ligand complexes**

Felix Riedlberger, Stefano Todisco, Piero Mastrorilli, Alexey Y. Timoshkin, Michael Seidl and  
Manfred Scheer\*

M. Sc. Felix Riedlberger, Dr. M. Seidl, Prof. M. Scheer  
Institut für Anorganische Chemie, Universität Regensburg  
93040 Regensburg (Germany)  
E-Mail: [manfred.scheer@ur.de](mailto:manfred.scheer@ur.de)  
Homepage: <http://www.uni-regensburg.de/chemie-pharmazie/anorganische-chemie-scheer/>

Dr. Stefano Todisco, Prof. Dr. Piero Mastrorilli  
Dipartimento di Ingegneria Civile, Ambientale, del Territorio Edile e di Chimica (DICATECh), Politecnico di  
Bari  
Via Orabona 4, 70125 Bari (Italy)

Prof. Dr. Alexey Y. Timoshkin  
Institute of Chemistry  
St. Petersburg State University  
Universitetskaya nab. 7/9, 199034 St. Petersburg (Russia)

## Table of Contents

1. Experimental details: complex synthesis and characterization
2. Experimental and simulated NMR spectra
3. Details on X-ray structure determinations
4. Details on DFT calculations
5. References

## 1. Experimental details: complex syntheses and characterization

**General Procedures:** All manipulations were performed with rigorous exclusion of oxygen and moisture in Schlenk-type glassware on a dual manifold Schlenk line in Argon atmosphere or in Argon filled glove box with a high-capacity recirculator (<0.1 ppm O<sub>2</sub>). THF, toluene, *n*-hexanes and acetonitrile were dried using conventional techniques, degassed and saturated with Argon. Deuterated solvents were degassed, dried and distilled prior to use. The complexes [Cp\*Fe(η<sup>5</sup>-P<sub>5</sub>)]<sup>[1]</sup> (**1**) and [Cp\*\*Ta(CO)<sub>2</sub>(η<sup>4</sup>-P<sub>4</sub>)]<sup>[2]</sup> (**2**) as well as the NHCs (IME,<sup>[3]</sup> IMes,<sup>[4]</sup> IDipp,<sup>[5]</sup> I<sup>t</sup>Bu,<sup>[6]</sup> IDipp=CH<sub>2</sub><sup>[7]</sup>) were prepared according to published procedure. NMR spectra were recorded on a Bruker Avance 300 MHz and Bruker Avance 400 MHz spectrometers. Chemical shifts are given in ppm; they are referenced to TMS for <sup>1</sup>H, and external 85% H<sub>3</sub>PO<sub>4</sub> for <sup>31</sup>P. Elemental analyses (CHN) were determined using in-house facility. NMR spectrum simulations were performed with the simulation module “daisy”, embedded in the software *Bruker Topspin* (V. 3.6.1). Solid-state <sup>31</sup>P NMR: <sup>1</sup>H-<sup>31</sup>P CP/MAS NMR experiments were performed on a Bruker Avance I 400 spectrometer using a 4.0 mm HX MAS probe at 298 K. The sample was packed in a zirconia rotor. A two-pulse phase modulation (TPPM) decoupling scheme was used for <sup>1</sup>H decoupling. The spectra were recorded using 3.25 μs proton π/2 pulse length, a ν<sub>CP</sub> of 55.0 kHz, a contact time of 5.0 ms, a ν<sub>dec</sub> of 76.9 kHz and a recycle delay of 6 s.

Due to the dynamic behavior of [Cp\*Fe(η<sup>4</sup>-P<sub>5</sub>IME)] (**3**), [Cp\*Fe(η<sup>4</sup>-P<sub>5</sub>IMes)] (**4**) and [Cp\*Fe(η<sup>4</sup>-P<sub>5</sub>IDipp)] (**5**) in solutions it was impossible to receive meaningful mass spectra. Due to the low solubility of **1** and NHCs at low temperatures and the dynamic behavior in solutions no <sup>13</sup>C{<sup>1</sup>H} NMR spectra of reasonable quality could be recorded.

Synthesis of **3**, [Cp\*Fe(η<sup>4</sup>-P<sub>5</sub>IME)]:

A solution of 100 mg (0.289 mmol) [Cp\*Fe(η<sup>5</sup>-P<sub>5</sub>)] and 35 mg (0.281 mmol) IME in 10 mL toluene was stirred for 1 hour. The solvent was removed in vacuum and the green precipitate dissolved in 3 mL thf, layered with 6 mL *n*-hexanes and stored at 4 °C to give green crystals overnight.

Crystalline yield: 60 mg, 0,123 mmol, 44.2%.

C<sub>17</sub>H<sub>27</sub>FeN<sub>2</sub>P<sub>5</sub> calc: C 43.43, H 5.79, N 5.96. found: C 43.50, H 5.74, N 5.81. <sup>1</sup>H NMR (400 MHz, toluene-d<sub>8</sub>, 213 K): δ = 2.29 (s, 6H, N(1,3)-*Me*), 1.91 (s, 15H, Cp\*), 0.38 (s, 6H, C(4,5)-*Me*). <sup>31</sup>P{<sup>1</sup>H} NMR (162 MHz, toluene-d<sub>8</sub>, 213 K): δ = 34.7 (m, P<sub>M</sub>/P<sub>M'</sub>), 31.6 (P<sub>A</sub>), -49.1 (m, P<sub>X</sub>/P<sub>X'</sub>). For coupling constants see Table S 1.

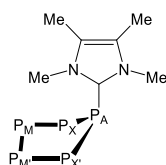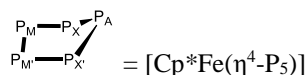

## SUPPORTING INFORMATION

**Synthesis of 4, [Cp\*Fe( $\eta^4$ -P<sub>5</sub>IMes)]:**

A solution of 100 mg (0.289 mmol) [Cp\*Fe( $\eta^5$ -P<sub>5</sub>)] and 88 mg (0.289 mmol) IMes in 10 mL toluene was stirred for 1 hour. The solvent was removed in vacuum and the green precipitate dissolved in 5 mL thf, layered with 10 mL *n*-hexanes and stored at -30 °C to give green crystals within 48 h.

Crystalline yield: 93 mg, 0.143 mmol, 49.5%.

C<sub>31</sub>H<sub>39</sub>FeN<sub>2</sub>P<sub>5</sub> calc: C 57.25, H 6.04, N 4.31. found: C 57.97, H 6.26, N 4.07. <sup>1</sup>H NMR (400 MHz, toluene-d<sub>8</sub>, 213 K):  $\delta$  = 6.74 (s, 4H, Ar-H), 4.82 (s, 2H, NCH), 2.19 (s, 6H, 4-Me), 1.99 (s, 12H, 2,6-Me), 1.67 (s, 15H, Cp\*). <sup>31</sup>P{<sup>1</sup>H} NMR (162 MHz, toluene-d<sub>8</sub>, 213 K):  $\delta$  = 44.0 (m, P<sub>A</sub>), 33.0 (m, P<sub>M</sub>/P<sub>M'</sub>), -66.0 (m, P<sub>X</sub>/P<sub>X'</sub>). For coupling constants see Table S 2.

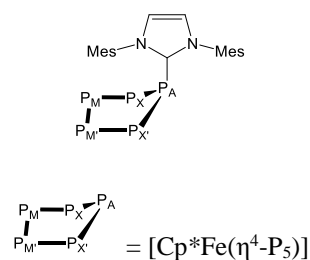**Synthesis of 5, [Cp\*Fe( $\eta^4$ -P<sub>5</sub>IDipp)]:**

A solution of 100 mg (0.289 mmol) [Cp\*Fe( $\eta^5$ -P<sub>5</sub>)] and 110 mg (0.289 mmol) IDipp in 10 mL toluene was stirred for 1 hour. All volatiles were removed in vacuum, the green precipitate dissolved in 4 mL thf, layered with 20 mL *n*-hexane and stored at -80 °C to give green crystals overnight.

Crystalline yield: 112 mg, 139 mmol, 48.0%.

C<sub>37</sub>H<sub>51</sub>FeN<sub>2</sub>P<sub>5</sub>·(thf) Calc: C 61.05, H 7.37, N 3.47. found: C 61.15, H 7.42, N 3.58. <sup>31</sup>P{<sup>1</sup>H} NMR (162 MHz, toluene-d<sub>8</sub>, 193K):  $\delta$  = 40.5 (m, 1P), 35.7 (m, 2P), -62.1 (m, 2P).

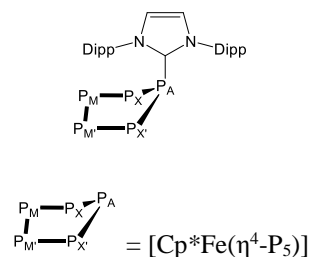

## SUPPORTING INFORMATION

**Synthesis of 6, [(IMe)<sub>2</sub>P][Cp''Ta(CO)<sub>2</sub>(η<sup>3</sup>-P<sub>3</sub>):**

100 mg (0.186 mmol) [Cp''Ta(CO)<sub>2</sub>(η<sup>4</sup>-P<sub>4</sub>)] and 100 mg (4.33 eq, 0.805 mmol) IMe were dissolved in 10 mL toluene. The light brownish red solution was stirred for an hour before the solvent was removed. The red precipitate was washed with *n*-hexanes to remove the excess of IMe and then dissolved in 5 mL MeCN. After storage at -30 °C for ten days, red crystals were formed which were suitable for X-ray investigations.

Crystalline yield: 88 mg, 0.112 mmol, 60.2%.

C<sub>29</sub>H<sub>45</sub>N<sub>4</sub>O<sub>2</sub>P<sub>4</sub>Ta calc: C 44.28, H 5.77, N 7.12. found: C 44.73, H 5.77, N 7.19. ESI-MS (acetonitrile): anion mode: *m/z* = 507.02 (100 %, [Cp''Ta(CO)<sub>2</sub>(η<sup>3</sup>-P<sub>3</sub>)<sup>-</sup>], cation mode: *m/z* = 279.18 (100%, [(IMe)<sub>2</sub>P]<sup>+</sup>). <sup>1</sup>H NMR (400 MHz, MeCN-d<sub>3</sub>, 25 °C): δ = 5.11 (t, <sup>4</sup>J<sub>HH</sub> = 2.2 Hz, 1H), 4.91 (d, <sup>4</sup>J<sub>HH</sub> = 2.2 Hz, 2H), 3.53 (s, 12H, N(1,3)-*Me*), 2.16 (s, 12H, C(4,5)-*Me*), 1.18 (s, 18H, <sup>t</sup>Bu). <sup>31</sup>P{<sup>1</sup>H} NMR (162 MHz, MeCN-d<sub>3</sub>, 25 °C): δ = -113.1 (s, 1P, IMe-*P*-IMe), -421.9 (s, 3P, cyclo-*P*<sub>3</sub>).

## SUPPORTING INFORMATION

## 2. Experimental and simulated NMR spectra

Variable temperature  $^{31}\text{P}\{^1\text{H}\}$  NMR spectra of **3** in the temperature range of 300 K to 193 K:

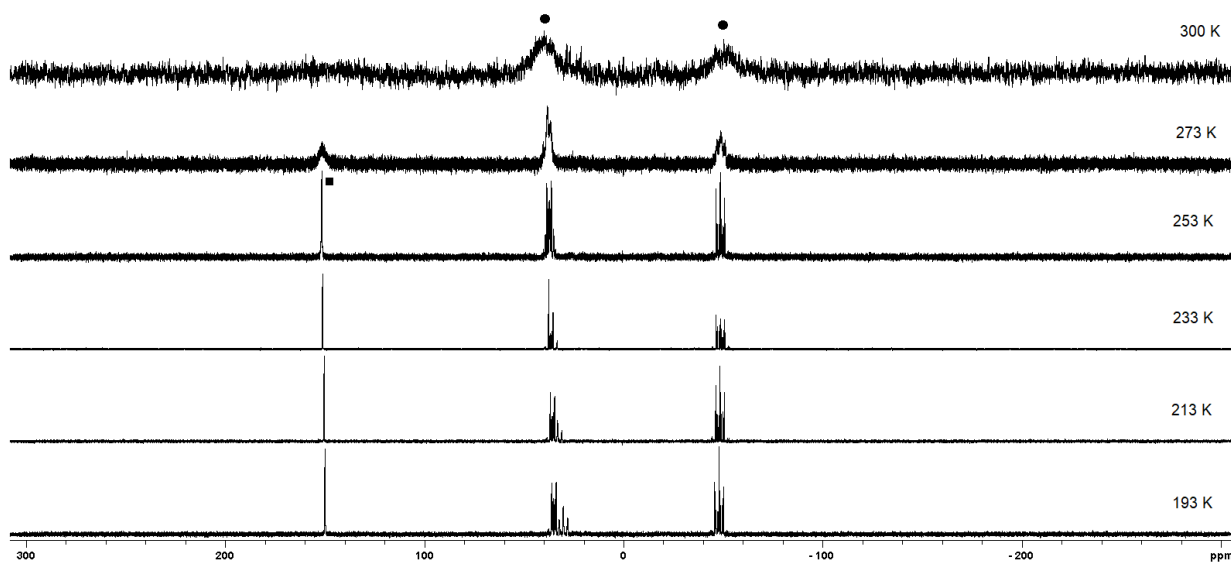

**Figure S 1.**  $^{31}\text{P}\{^1\text{H}\}$  NMR spectra of freshly prepared solution of **1** and IMe in toluene- $d_8$  in temperature range of 193 K to 300 K. The signal marked with ■ is assigned to **1**. At 300 K first interactions can be detected and is marked with •. These signals are getting clearer when cooling down and are assigned to compound **3**.

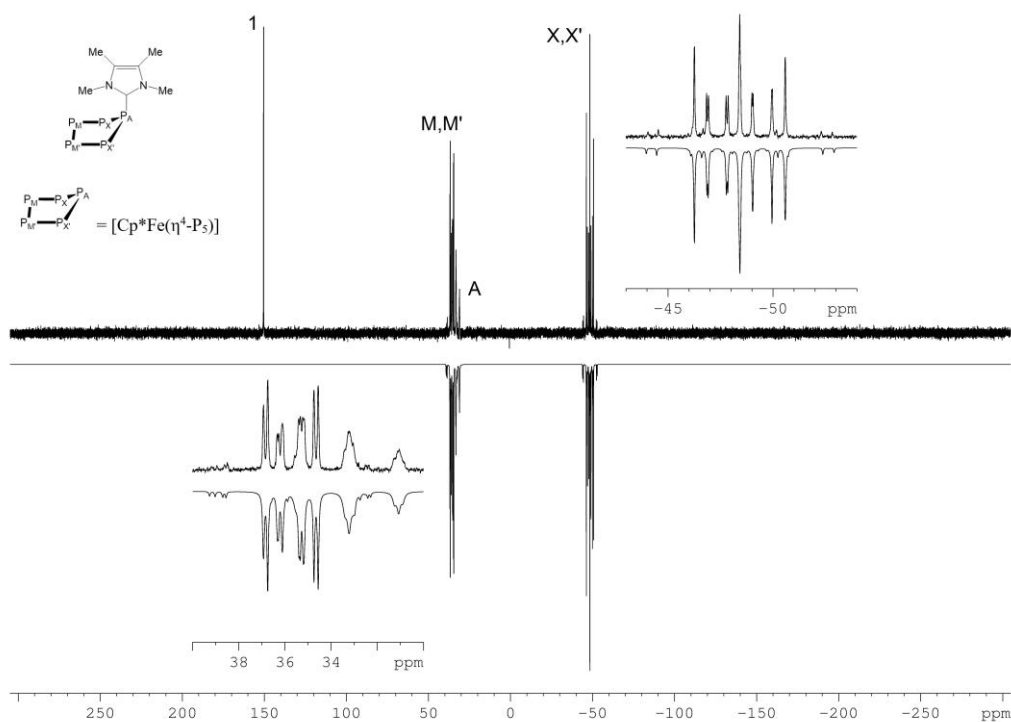

**Figure S 2.** Experimental (top) and simulated (bottom)  $^{31}\text{P}\{^1\text{H}\}$  NMR (162 MHz, toluene- $d_8$ ) spectrum of **3** at 213 K.

## SUPPORTING INFORMATION

**Table S 1.** Chemical shifts and coupling constants obtained from the simulation of the  $^{31}\text{P}\{^1\text{H}\}$  NMR spectrum of **3** at 213 K.

| $J$ (Hz)                           |       |                                       |       | $\delta$ (ppm)  |       |
|------------------------------------|-------|---------------------------------------|-------|-----------------|-------|
| $^2 J_{\text{P}_A, \text{P}_M}$    | -32.0 | $^1 J_{\text{P}_M, \text{P}_X}$       | 365.0 | $\text{P}_A$    | 31.6  |
| $^2 J_{\text{P}_A, \text{P}_{M'}}$ | -32.0 | $^2 J_{\text{P}_M, \text{P}_{X'}}$    | -8.0  | $\text{P}_M$    | 34.7  |
| $^1 J_{\text{P}_A, \text{P}_X}$    | 355.0 | $^1 J_{\text{P}_{M'}, \text{P}_{X'}}$ | 365.0 | $\text{P}_{M'}$ | 34.7  |
| $^1 J_{\text{P}_A, \text{P}_{X'}}$ | 355.0 | $^2 J_{\text{P}_{M'}, \text{P}_X}$    | -8.0  | $\text{P}_X$    | -49.1 |
| $^1 J_{\text{P}_M, \text{P}_{M'}}$ | 430.0 | $^2 J_{\text{P}_X, \text{P}_{X'}}$    | -50.0 | $\text{P}_{X'}$ | -49.1 |

**Variable temperature  $^{31}\text{P}\{^1\text{H}\}$  NMR spectra of **4** in the temperature range of 300 K to 193 K:**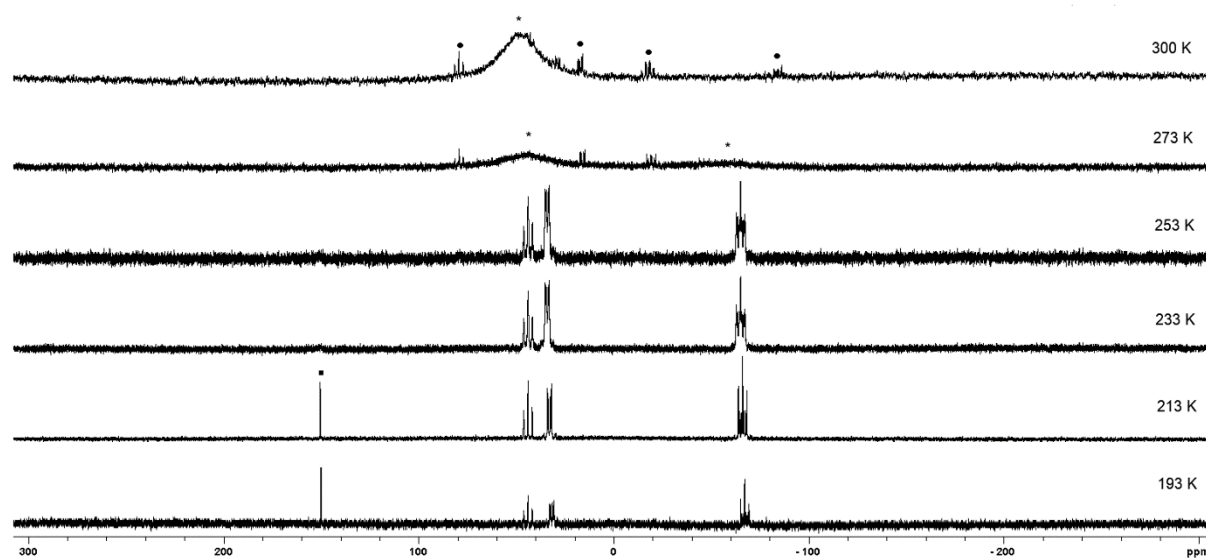**Figure S 3.**  $^{31}\text{P}\{^1\text{H}\}$  NMR spectra of freshly prepared solution of **1** and IMes in toluene- $d_8$  in temperature range of 193 K to 300 K. The signals marked with ■ and ● are assigned to **1** and impurities, respectively.

## SUPPORTING INFORMATION

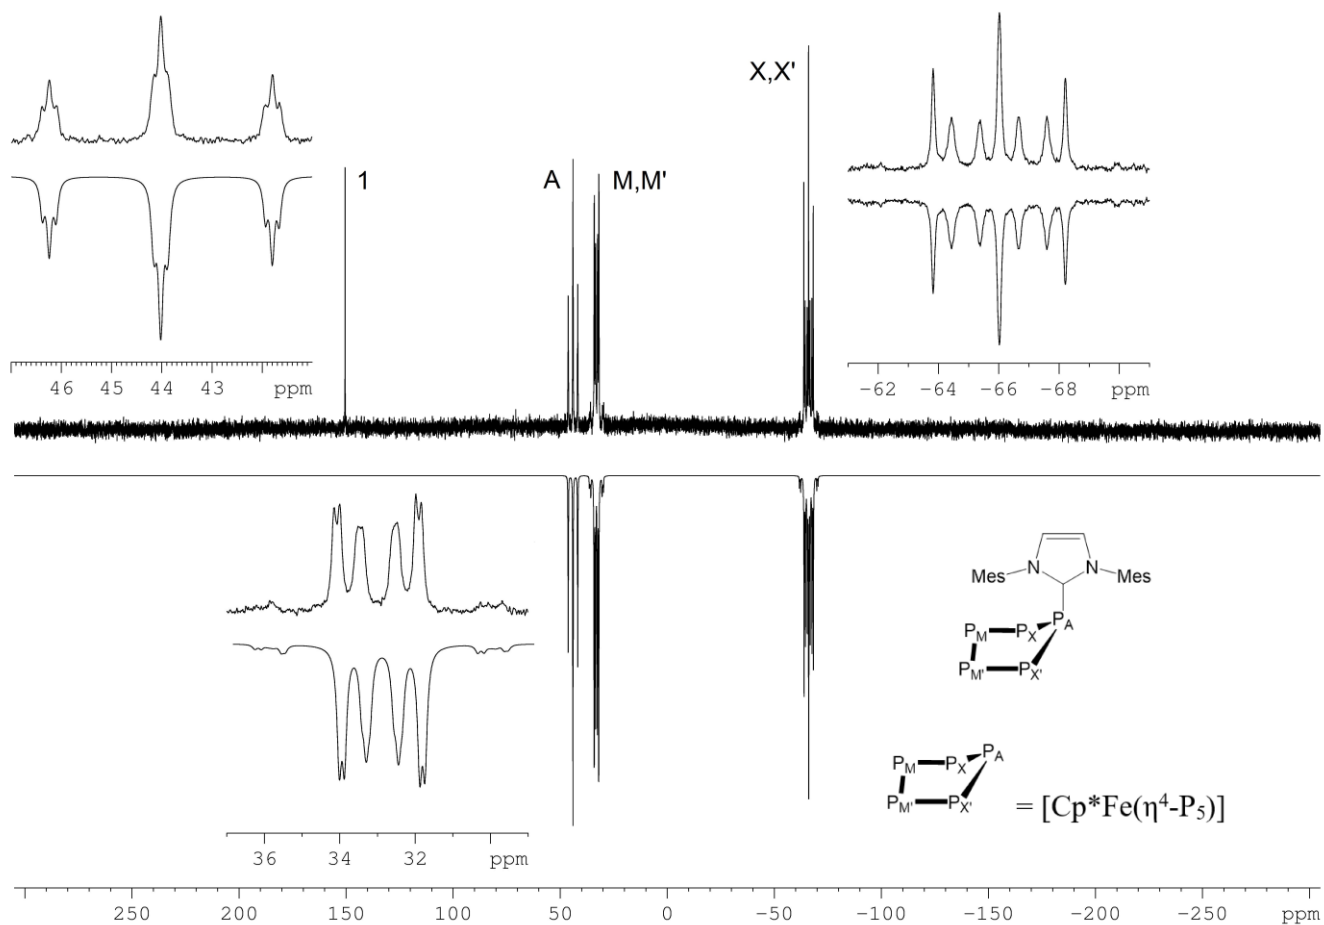

**Figure S 4.** Experimental (top) and simulated (bottom)  $^{31}\text{P}\{^1\text{H}\}$  NMR (162 MHz, toluene- $d_8$ ) spectrum of **4** at 213 K.

**Table S 2.** Chemical shifts and coupling constants obtained from the simulation of the  $^{31}\text{P}\{^1\text{H}\}$  NMR spectrum of **4** at 213 K.

| $J$ (Hz)                                         |       |                                                     |       | $\delta$ (ppm)         |       |
|--------------------------------------------------|-------|-----------------------------------------------------|-------|------------------------|-------|
| $^2 J_{\text{P}_\text{A}, \text{P}_\text{M}}$    | -23.0 | $^1 J_{\text{P}_\text{M}, \text{P}_\text{X}}$       | 354.0 | $\text{P}_\text{A}$    | 44.0  |
| $^2 J_{\text{P}_\text{A}, \text{P}_{\text{M}'}}$ | -23.0 | $^2 J_{\text{P}_\text{M}, \text{P}_{\text{X}'}}$    | -8.0  | $\text{P}_\text{M}$    | 33.0  |
| $^1 J_{\text{P}_\text{A}, \text{P}_\text{X}}$    | 354.7 | $^1 J_{\text{P}_{\text{M}'}, \text{P}_{\text{X}'}}$ | 354.0 | $\text{P}_{\text{M}'}$ | 33.0  |
| $^1 J_{\text{P}_\text{A}, \text{P}_{\text{X}'}}$ | 354.7 | $^2 J_{\text{P}_{\text{M}'}, \text{P}_\text{X}}$    | -8.0  | $\text{P}_\text{X}$    | -66.0 |
| $^1 J_{\text{P}_\text{M}, \text{P}_{\text{M}'}}$ | 410.0 | $^2 J_{\text{P}_\text{X}, \text{P}_{\text{X}'}}$    | -55.0 | $\text{P}_{\text{X}'}$ | -66.0 |



## SUPPORTING INFORMATION

Variable temperature  $^{31}\text{P}\{^1\text{H}\}$  NMR spectra of **5** in the temperature range of 300 K to 193 K:

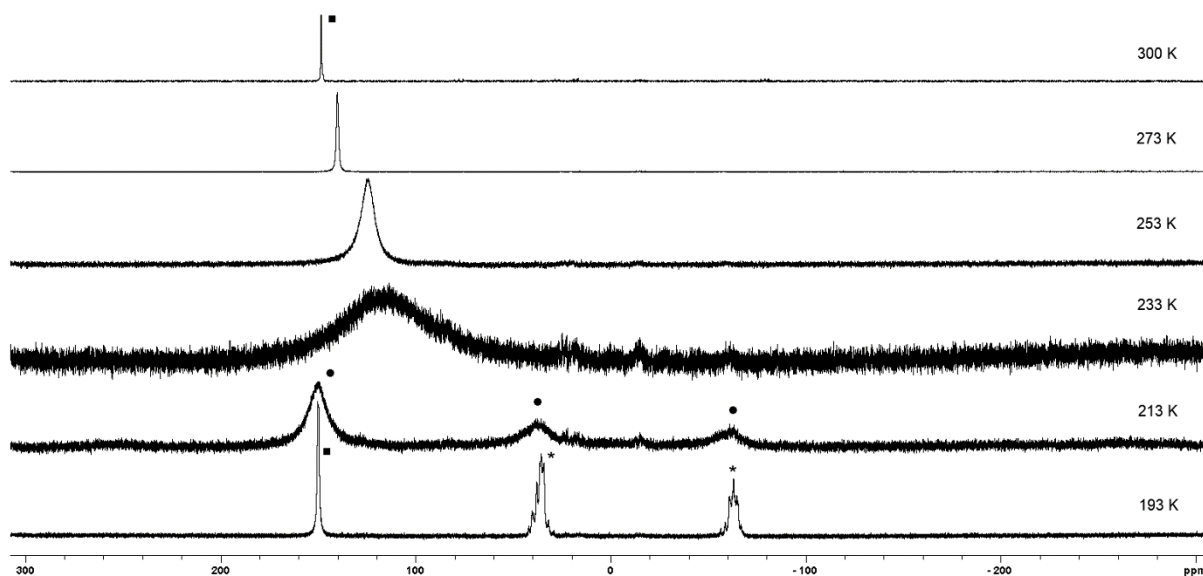

**Figure S 5.**  $^{31}\text{P}\{^1\text{H}\}$  NMR spectra of freshly prepared solution of **1** and IDipp in toluene- $d_8$  in temperature range of 193 K to 300 K.

Variable temperature  $^{31}\text{P}\{^1\text{H}\}$  NMR spectra of **1** and  $t^i\text{Bu}$  in the temperature range of 300 K to 193 K:

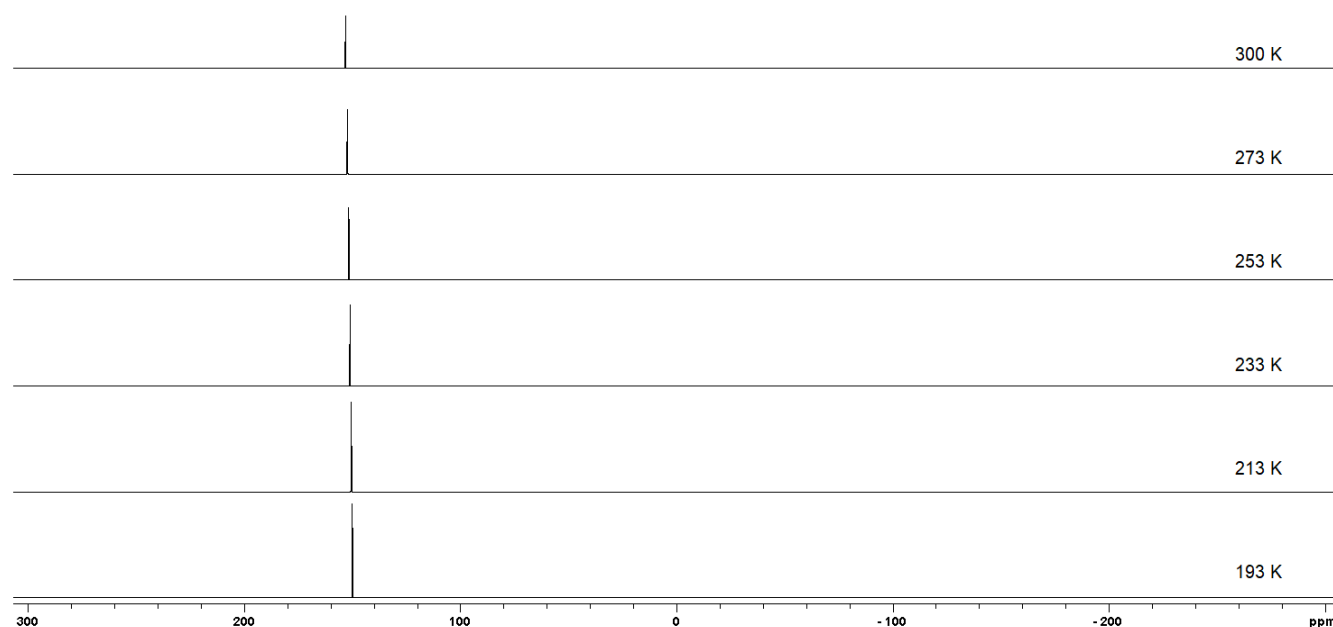

**Figure S 6.**  $^{31}\text{P}\{^1\text{H}\}$  NMR spectra of freshly prepared solution of **1** and  $t^i\text{Bu}$  in toluene- $d_8$  in temperature range of 193 K to 300 K. Only the signal for **1** is detected.

## SUPPORTING INFORMATION

Variable temperature  $^{31}\text{P}\{^1\text{H}\}$  NMR spectra of **1** and IDipp=CH<sub>2</sub> in the temperature range of 300 K to 193 K:

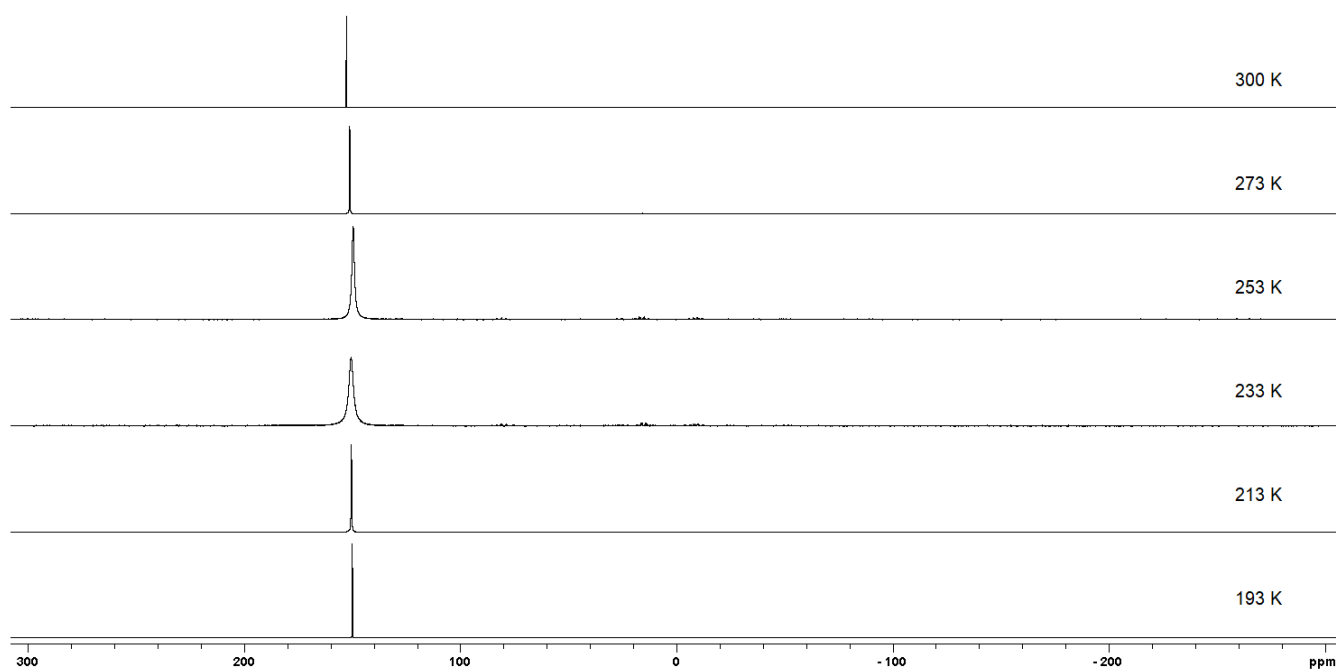

**Figure S 7.**  $^{31}\text{P}\{^1\text{H}\}$  NMR spectra of freshly prepared solution of **1** and IDipp=CH<sub>2</sub> in toluene- $d_8$  in temperature range of 193 K to 300 K. Only the signal for **1** is detected.

$^{31}\text{P}\{^1\text{H}\}$  NMR spectrum of **6**:

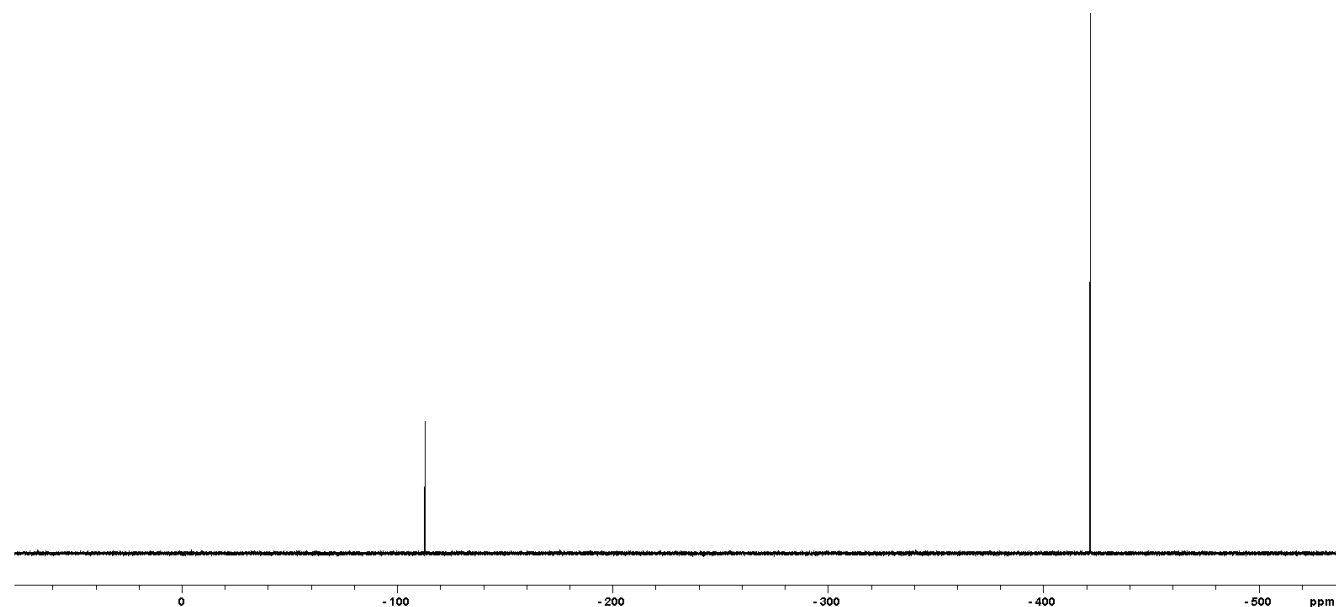

**Figure S 8.**  $^{31}\text{P}\{^1\text{H}\}$  NMR spectrum of compound **6** at 300 K in MeCN- $d_3$ . The singlet at -113.1 ppm is assigned to the cation  $[(\text{IMe})_2\text{P}]^+$  and the signal at -421.9 ppm is assigned to the anionic complex  $[\text{Cp}''\text{Ta}(\text{CO})_2(\eta^3\text{-P}_3)]^-$ .

## SUPPORTING INFORMATION

**3. Crystallographic Details**

The crystals were selected and mounted on a GV50 diffractometer equipped with a TitanS2 detector. All crystals were kept at  $T = 123(1)$  K during data collection. Data collection and reduction were performed with **CrysAlisPro** version 1.171.40.14a.<sup>[8]</sup> For compound (**3**) an analytical numeric absorption correction using a multifaceted crystal model based on expressions derived by R.C. Clark & J.S. Reid. (Clark, R. C. & Reid, J. S. (1995). *Acta Cryst.* A51, 887-897) was applied. For the compounds (**4**, **5**, **6**) a numerical absorption correction based on gaussian integration over a multifaceted crystal model and an empirical absorption correction using spherical harmonics, implemented in SCALE3 ABSPACK scaling algorithm was applied. Using **Olex2**,<sup>[9]</sup> all structures were solved by **ShelXT**<sup>[10]</sup> and a least-square refinement on  $F^2$  was carried out with **ShelXL**.<sup>[11]</sup> All non-hydrogen atoms were refined anisotropically. Hydrogen atoms at the carbon atoms were located in idealized positions and refined isotropically according to the riding model.

The images showing the compounds **3-6** were generated using **Olex2**.<sup>[9]</sup>

CCDC-2015543 (**3**), CCDC-2015544 (**4**), CCDC-2015545 (**5**) and CCDC-2015546 (**6**), contain the supplementary crystallographic data for this paper. These data can be obtained free of charge at [www.ccdc.cam.ac.uk/contents/retrieving.html](http://www.ccdc.cam.ac.uk/contents/retrieving.html) (or from the Cambridge Crystallographic Data Centre, 12 Union Road, Cambridge CB2 1EZ, UK; Fax: +44-1223-336-033; e-mail: deposit@ccdc.com.ac.uk).

**Compound 3:** There is one single molecule of **3** in the asymmetric unit

**Compound 4:** The asymmetric unit contains one molecule of **4** and two thf solvent molecules. One of these thf molecules was heavily disordered. Therefore, a solvent mask was calculated and 152 electrons were found in a volume of  $520 \text{ \AA}^3$  in one void per unit cell. This is consistent with the presence of one thf molecule per asymmetric unit, which account for 160 electrons per unit cell. Further, the second thf molecule showed a disorder over two positions (67:33). Additionally, both the  $P_5$  and the  $Cp^*$  ligand are disordered over two position with a distribution of 58:42 and 62:38, respectively. The restraints SADI and SIMU were applied to describe these disorders.

**Compound 5:** Crystals of compound **5** were very sensitive and could only be handled at low temperatures ( $-70^\circ\text{C}$ ). Further, the quality of the crystals was very low, despite several attempts of recrystallization. Additionally, the crystals were weakly diffracting, which is the reason that no reflections above a resolution of 0.89, with an  $1/\sigma$  higher than 3, could be detected. Although, the data quality does not allow the discussion of bond length or angles, the atom connectivity in compound **5** could still be determined unambiguously.

The asymmetric unit contains one molecule of **5** and 4.3 thf solvent molecules. Two of these thf solvent molecules were heavily disordered. Therefore, a solvent mask was calculated and 368 electrons were found in a volume of  $1418 \text{ \AA}^3$  in one void per unit cell. This is consistent with the presence of 2.3 thf molecules per asymmetric unit, which account for 368 electrons per unit cell. Additionally the  $P_5$  ligand shows a disorder over two positions (82:18). To describe this disorder the SADI and SIMU restraint was applied.

The asymmetric unit contains one molecule of **5** and 4.3 thf solvent molecules. Two of these thf solvent molecules were heavily disordered. Therefore, a solvent mask was calculated and 368 electrons were found in a volume of  $1418 \text{ \AA}^3$  in one void per unit cell. This is consistent with the presence of 2.3 thf molecules per asymmetric unit, which account for 368 electrons per unit cell. Additionally the  $P_5$  ligand shows a disorder over two positions (82:18). To describe this disorder the SADI and SIMU restraint was applied.

**Compound 6:** The asymmetric unit contains the cation  $[(\text{Ime})_2\text{P}]^+$  and the anion  $[\text{Cp}''\text{Ta}(\text{CO})_2(\eta^3\text{-P}_3)]^-$ .

## SUPPORTING INFORMATION

**Table S 3.** Crystallographic data and details of the compounds **3**, **4**, **5** and **6**.

| Compound                                       | 3                                                               | 4 · 2 thf                                                                      | 5 · 4.3 thf                                                                          | 6                                                                               |
|------------------------------------------------|-----------------------------------------------------------------|--------------------------------------------------------------------------------|--------------------------------------------------------------------------------------|---------------------------------------------------------------------------------|
| File Name                                      | FR155                                                           | FR162                                                                          | FR313                                                                                | FR264                                                                           |
| CCDC                                           | 2015543                                                         | 2015544                                                                        | 2015545                                                                              | 2015546                                                                         |
| Formula                                        | C <sub>17</sub> H <sub>27</sub> FeN <sub>2</sub> P <sub>5</sub> | C <sub>39</sub> FeH <sub>55</sub> N <sub>2</sub> O <sub>2</sub> P <sub>5</sub> | C <sub>54.2</sub> FeH <sub>85.4</sub> N <sub>2</sub> O <sub>4.3</sub> P <sub>5</sub> | C <sub>29</sub> H <sub>45</sub> N <sub>4</sub> O <sub>2</sub> P <sub>4</sub> Ta |
| <i>D</i> <sub>calc.</sub> / g cm <sup>-3</sup> | 1.478                                                           | 1.305                                                                          | 1.211                                                                                | 1.542                                                                           |
| $\mu$ /mm <sup>-1</sup>                        | 9.334                                                           | 5.132                                                                          | 3.767                                                                                | 8.023                                                                           |
| Formula Weight                                 | 470.10                                                          | 794.55                                                                         | 1044.54                                                                              | 786.52                                                                          |
| Colour                                         | dark green                                                      | dark green                                                                     | green                                                                                | red                                                                             |
| Shape                                          | block                                                           | block                                                                          | plate                                                                                | plate                                                                           |
| Size/mm <sup>3</sup>                           | 0.37×0.15×0.09                                                  | 0.50×0.30×0.24                                                                 | 0.28×0.15×0.04                                                                       | 0.25×0.13×0.06                                                                  |
| <i>T</i> /K                                    | 122.99(16)                                                      | 123.00(10)                                                                     | 122.96(11)                                                                           | 123.0(2)                                                                        |
| Crystal System                                 | monoclinic                                                      | monoclinic                                                                     | monoclinic                                                                           | monoclinic                                                                      |
| Space Group                                    | <i>I</i> 2/ <i>a</i>                                            | <i>P</i> 2 <sub>1</sub> / <i>n</i>                                             | <i>P</i> 2 <sub>1</sub> / <i>c</i>                                                   | <i>P</i> 2 <sub>1</sub> / <i>c</i>                                              |
| <i>a</i> /Å                                    | 13.9605(2)                                                      | 14.6421(5)                                                                     | 13.6902(11)                                                                          | 13.3561(8)                                                                      |
| <i>b</i> /Å                                    | 12.4727(2)                                                      | 18.3526(6)                                                                     | 19.6372(9)                                                                           | 10.5354(6)                                                                      |
| <i>c</i> /Å                                    | 24.9230(5)                                                      | 15.9403(6)                                                                     | 22.1012(16)                                                                          | 24.9298(16)                                                                     |
| $\alpha$ /°                                    | 90                                                              | 90                                                                             | 90                                                                                   | 90                                                                              |
| $\beta$ /°                                     | 103.223(2)                                                      | 109.217(4)                                                                     | 105.284(8)                                                                           | 105.029(6)                                                                      |
| $\gamma$ /°                                    | 90                                                              | 90                                                                             | 90                                                                                   | 90                                                                              |
| <i>V</i> /Å <sup>3</sup>                       | 4224.66(13)                                                     | 4044.8(3)                                                                      | 5731.5(7)                                                                            | 3387.9(4)                                                                       |
| <i>Z</i>                                       | 8                                                               | 4                                                                              | 4                                                                                    | 4                                                                               |
| <i>Z'</i>                                      | 1                                                               | 1                                                                              | 1                                                                                    | 1                                                                               |
| Wavelength/Å                                   | 1.54184                                                         | 1.54184                                                                        | 1.54184                                                                              | 1.54184                                                                         |
| Radiation type                                 | Cu K $\alpha$                                                   | Cu K $\alpha$                                                                  | Cu K $\alpha$                                                                        | CuK $\alpha$                                                                    |
| $\theta$ <sub>min</sub> /°                     | 3.644                                                           | 3.558                                                                          | 3.347                                                                                | 3.426                                                                           |
| $\theta$ <sub>max</sub> /°                     | 74.344                                                          | 74.685                                                                         | 60.002                                                                               | 74.851                                                                          |
| Measured Refl's.                               | 18138                                                           | 38670                                                                          | 20741                                                                                | 17862                                                                           |
| Ind't Refl's                                   | 4225                                                            | 8099                                                                           | 8371                                                                                 | 6595                                                                            |
| Refl's with <i>I</i> > 2( <i>I</i> )           | 4129                                                            | 7434                                                                           | 5639                                                                                 | 5529                                                                            |
| <i>R</i> <sub>int</sub>                        | 0.0363                                                          | 0.0810                                                                         | 0.1108                                                                               | 0.0753                                                                          |
| Parameters                                     | 235                                                             | 558                                                                            | 555                                                                                  | 375                                                                             |
| Restraints                                     | 0                                                               | 166                                                                            | 16                                                                                   | 0                                                                               |
| Largest Peak                                   | 0.524                                                           | 0.665                                                                          | 1.182                                                                                | 4.492                                                                           |
| Deepest Hole                                   | -0.661                                                          | -0.552                                                                         | -0.519                                                                               | -3.513                                                                          |
| GooF                                           | 1.061                                                           | 1.031                                                                          | 1.015                                                                                | 1.039                                                                           |
| <i>wR</i> <sub>2</sub> (all data)              | 0.0911                                                          | 0.1197                                                                         | 0.2740                                                                               | 0.1996                                                                          |
| <i>wR</i> <sub>2</sub>                         | 0.0904                                                          | 0.1163                                                                         | 0.2416                                                                               | 0.1869                                                                          |
| <i>R</i> <sub>1</sub> (all data)               | 0.0340                                                          | 0.0461                                                                         | 0.1169                                                                               | 0.0811                                                                          |
| <i>R</i> <sub>1</sub>                          | 0.0334                                                          | 0.0431                                                                         | 0.0911                                                                               | 0.0704                                                                          |

## SUPPORTING INFORMATION

## Compound 3:

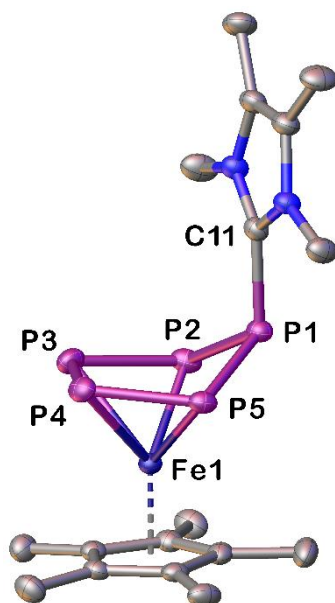

| Selected Bond Lengths in Å |           | Selected Bond Angles in ° |           |
|----------------------------|-----------|---------------------------|-----------|
| <b>P1–C11</b>              | 1.860(2)  | <b>C11–P1–P2</b>          | 114.99(7) |
| <b>P1–P2</b>               | 2.1572(7) | <b>C11–P1–P5</b>          | 111.43(6) |
| <b>P2–P3</b>               | 2.1552(8) | <b>P1–P2–P3</b>           | 107.62(3) |
| <b>P3–P4</b>               | 2.1302(8) | <b>P2–P3–P4</b>           | 104.18(3) |
| <b>P4–P5</b>               | 2.1491(7) | <b>P3–P4–P5</b>           | 104.19(3) |
| <b>P5–P1</b>               | 2.1621(7) | <b>P4–P5–P1</b>           | 107.86(3) |
| <b>Fe1–P2</b>              | 2.2979(6) | <b>P5–P1–P2</b>           | 95.03(3)  |
| <b>Fe1–P3</b>              | 2.3415(6) |                           |           |
| <b>Fe1–P4</b>              | 2.3422(6) |                           |           |
| <b>Fe1–P5</b>              | 2.3077(5) |                           |           |

## SUPPORTING INFORMATION

## Compound 4:

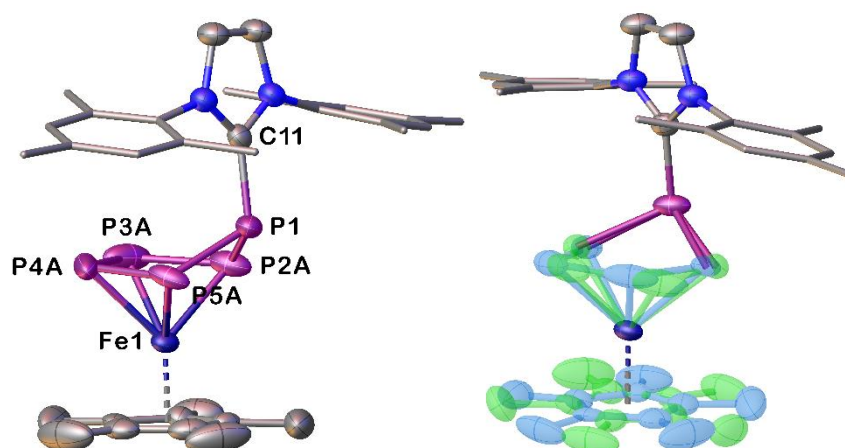

| Selected Bond Lengths in Å |          | Selected Bond Angles in ° |            |
|----------------------------|----------|---------------------------|------------|
| <b>P1–C11</b>              | 1.849(2) | <b>C11–P1–P2A</b>         | 112.21(9)  |
| <b>P1–P2A</b>              | 2.063(3) | <b>C11–P1–P5A</b>         | 112.21(15) |
| <b>P2A–P3A</b>             | 2.143(3) | <b>P1–P2A–P3A</b>         | 107.57(11) |
| <b>P3A–P4A</b>             | 2.115(3) | <b>P2A–P3A–P4A</b>        | 104.12(12) |
| <b>P4A–P5A</b>             | 2.138(5) | <b>P3A–P4A–P5A</b>        | 104.08(16) |
| <b>P5A–P1</b>              | 2.184(5) | <b>P4A–P5A–P1</b>         | 105.7(2)   |
| <b>Fe1–P2A</b>             | 2.339(3) | <b>P5A–P1–P2A</b>         | 96.04(14)  |
| <b>Fe1–P3A</b>             | 2.353(2) |                           |            |
| <b>Fe1–P4A</b>             | 2.303(2) |                           |            |
| <b>Fe1–P5A</b>             | 2.263(5) |                           |            |

## SUPPORTING INFORMATION

## Compound 5:

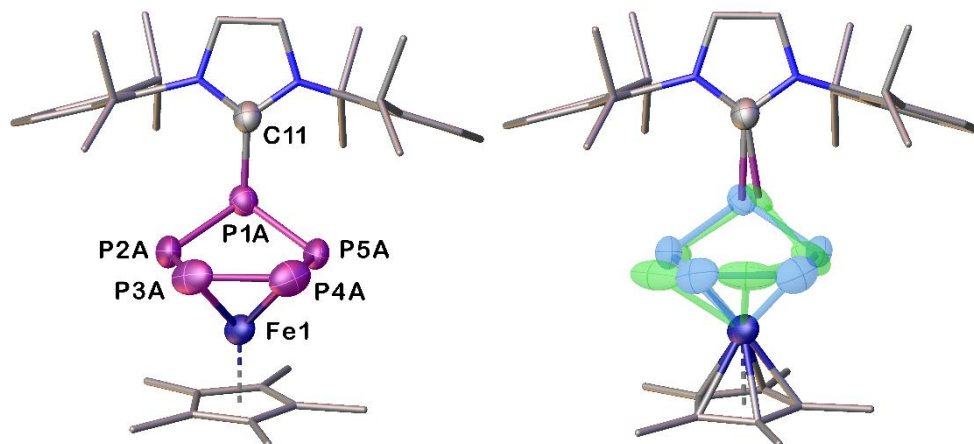

In the subsequent Table selected bond length and angles of compound **5** are listed. However, it should be kept in mind, that the data quality of the measurement was low. Therefore, the listed bond length and angles are only given to get a rough insight in the connectivity of **5**.

| Selected Bond Lengths in Å |          | Selected Bond Angles in ° |            |
|----------------------------|----------|---------------------------|------------|
| <b>P1A–C11</b>             | 1.900(7) | <b>C11–P1A–P2A</b>        | 113.8(3)   |
| <b>P1A–P2A</b>             | 2.146(4) | <b>C11–P1A–P5A</b>        | 110.4(3)   |
| <b>P2A–P3A</b>             | 2.144(5) | <b>P1A–P2A–P3A</b>        | 109.00(19) |
| <b>P3A–P4A</b>             | 2.113(5) | <b>P2A–P3A–P4A</b>        | 105.19(14) |
| <b>P4A–P5A</b>             | 2.151(5) | <b>P3A–P4A–P5A</b>        | 104.11(18) |
| <b>P5A–P1A</b>             | 2.155(4) | <b>P4A–P5A–P1A</b>        | 109.2(2)   |
| <b>Fe1–P2A</b>             | 2.295(3) | <b>P5A–P1A–P2A</b>        | 96.1(2)    |
| <b>Fe1–P3A</b>             | 2.343(2) |                           |            |
| <b>Fe1–P4A</b>             | 2.387(3) |                           |            |
| <b>Fe1–P5A</b>             | 2.338(4) |                           |            |

## SUPPORTING INFORMATION

## Compound 6:

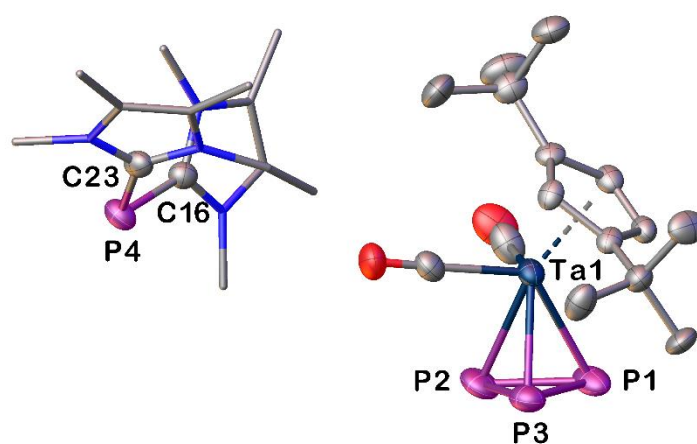

| Selected Bond Lengths in Å |          | Selected Bond Angles in ° |           |
|----------------------------|----------|---------------------------|-----------|
| <b>P1–P2</b>               | 2.184(4) | <b>P1–P2–P3</b>           | 60.26(12) |
| <b>P1–P2</b>               | 2.186(3) | <b>P2–P3–P1</b>           | 59.53(13) |
| <b>P1–P2</b>               | 2.169(4) | <b>P3–P1–P2</b>           | 60.21(12) |
| <b>P4–C16</b>              | 1.797(8) | <b>C16–P4–C23</b>         | 97.9(3)   |
| <b>P4–C23</b>              | 1.796(8) | <b>P1–Ta1–P2</b>          | 49.49(9)  |
| <b>Ta1–P1</b>              | 2.568(2) | <b>P2–Ta1–P3</b>          | 49.91(9)  |
| <b>Ta1–P2</b>              | 2.614(2) | <b>P3–Ta1–P1</b>          | 50.43(8)  |
| <b>Ta1–P3</b>              | 2.563(2) |                           |           |



## SUPPORTING INFORMATION

## 4. Details on DFT calculations

The geometries of the compounds have been fully optimized with gradient-corrected density functional theory (DFT) in form of Becke's three-parameter hybrid method B3LYP<sup>[12]</sup> with all electron 6-31G\* basis set as implemented in Gaussian 09 program package.<sup>[13]</sup> All structures correspond to minima on their respective potential energy surfaces as verified by the subsequent vibrational analysis.

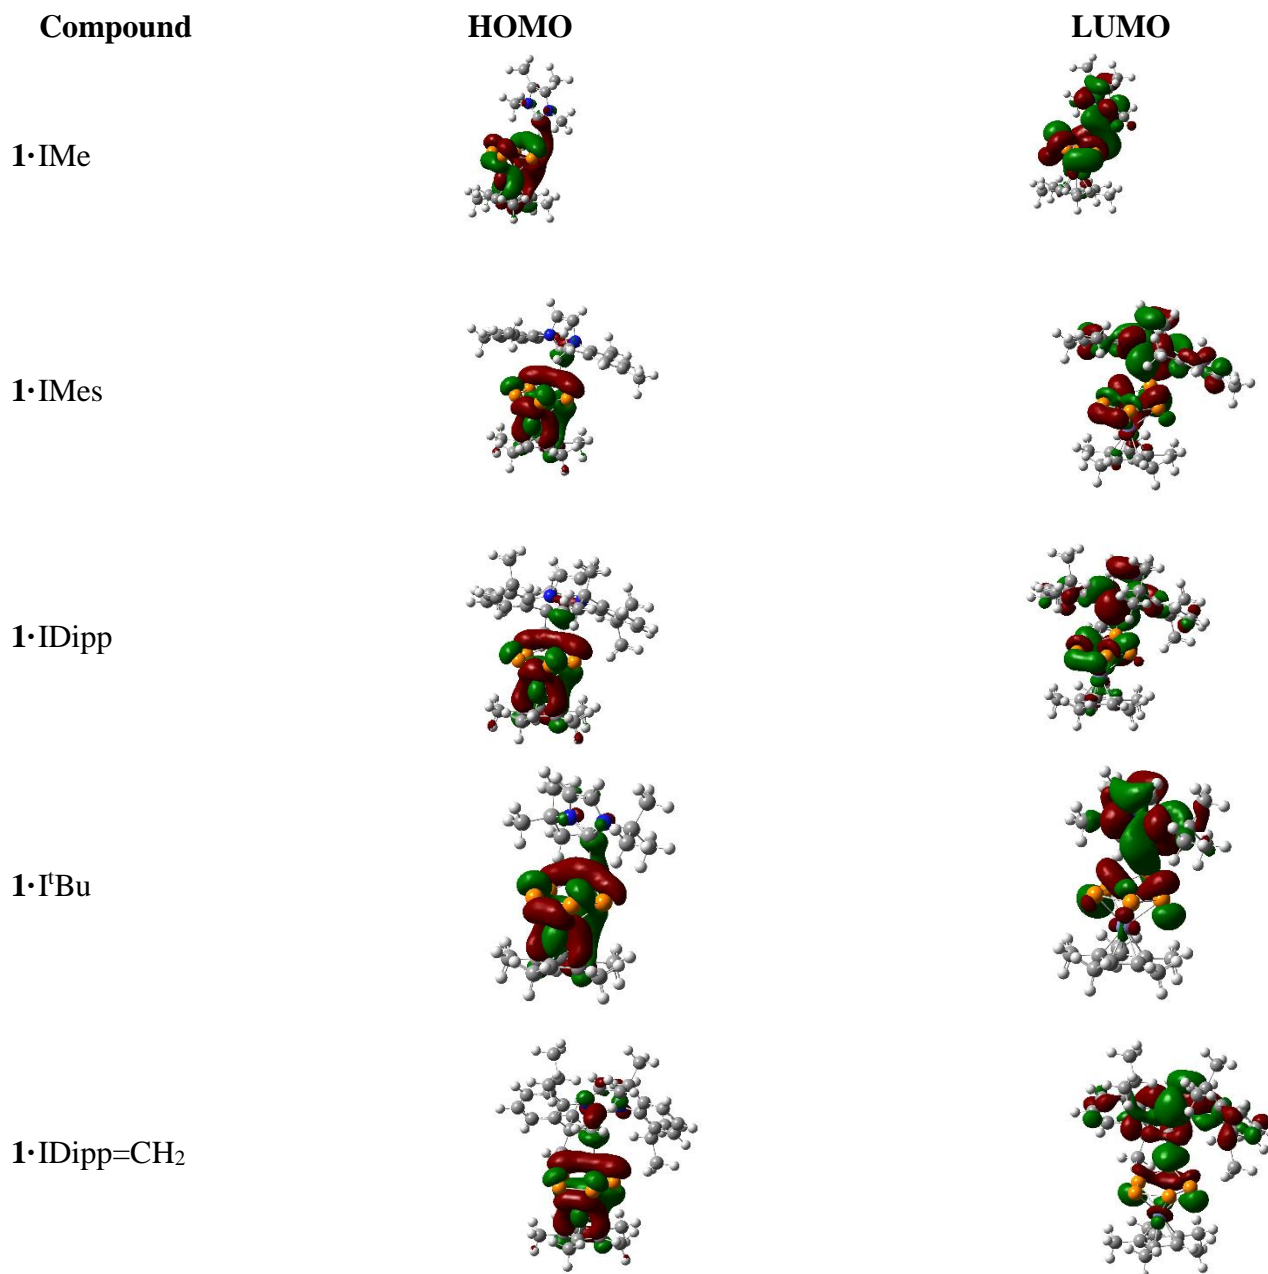

Figure S 9. HOMO and LUMO of the compounds 1•LB.

## SUPPORTING INFORMATION

**Table S 4.** Total energies  $E^{\circ}_0$ , sum of electronic and thermal enthalpies  $H^{\circ}_{298}$  (Hartree) and standard entropies  $S^{\circ}_{298}$  (cal mol<sup>-1</sup>K<sup>-1</sup>), B3LYP/6-31G\* level of theory.

| Compound                        | $E^{\circ}_0$ | $H^{\circ}_{298}$ | $S^{\circ}_{298}$ |
|---------------------------------|---------------|-------------------|-------------------|
| <b>1</b>                        | -3360.581389  | -3360.32536       | 141.236           |
| IMe                             | -383.4330252  | -383.238585       | 94.543            |
| IMes                            | -924.1712522  | -923.748456       | 170.758           |
| IDipp                           | -1160.035165  | -1159.431988      | 201.557           |
| I <sup>t</sup> Bu               | -540.6829029  | -540.370817       | 117.416           |
| IDipp=CH <sub>2</sub>           | -1199.35876   | -1198.726726      | 206.183           |
| <b>1</b> •IMe                   | -3744.032328  | -3743.578663      | 198.213           |
| <b>1</b> •IMes                  | -4284.764922  | -4284.084528      | 259.300           |
| <b>1</b> •IDipp                 | -4520.622797  | -4519.76108       | 295.303           |
| <b>1</b> •I <sup>t</sup> Bu     | -3901.248443  | -3900.678339      | 208.290           |
| <b>1</b> •IDipp=CH <sub>2</sub> | -4559.936175  | -4559.044872      | 304.439           |

**Table S 5.** Optimized geometries of theoretically studied compounds. xyz coordinates in angstroms. B3LYP/6-31G\* level of theory.

| <b>[Cp*Fe(η<sup>5</sup>-P<sub>5</sub>)] (1)</b> |              |              |              |
|-------------------------------------------------|--------------|--------------|--------------|
| 26                                              | -0.075360000 | 0.000085000  | 0.000031000  |
| 15                                              | -1.654218000 | 1.311178000  | -1.258387000 |
| 15                                              | -1.653967000 | -0.792072000 | -1.634911000 |
| 15                                              | -1.654322000 | -1.799677000 | 0.248956000  |
| 15                                              | -1.651109000 | 1.603476000  | 0.858073000  |
| 15                                              | -1.654404000 | -0.319304000 | 1.789495000  |
| 6                                               | 1.623539000  | 0.216888000  | -1.200334000 |
| 6                                               | 1.623440000  | -1.074291000 | -0.578033000 |
| 6                                               | 1.624473000  | 1.207397000  | -0.164594000 |
| 6                                               | 1.623648000  | -0.881921000 | 0.841844000  |
| 6                                               | 1.625751000  | 0.528285000  | 1.097435000  |
| 6                                               | 1.711293000  | 1.179464000  | 2.447225000  |
| 1                                               | 1.227445000  | 2.159900000  | 2.455420000  |
| 1                                               | 2.762003000  | 1.321882000  | 2.733561000  |
| 1                                               | 1.234936000  | 0.571703000  | 3.220971000  |
| 6                                               | 1.704000000  | -1.965763000 | 1.877111000  |
| 1                                               | 1.233057000  | -1.663910000 | 2.816378000  |
| 1                                               | 2.753255000  | -2.209159000 | 2.091426000  |
| 1                                               | 1.210114000  | -2.882183000 | 1.542548000  |
| 6                                               | 1.708089000  | -2.394470000 | -1.287313000 |
| 1                                               | 1.221526000  | -3.192525000 | -0.719243000 |
| 1                                               | 2.758922000  | -2.679740000 | -1.431862000 |
| 1                                               | 1.234302000  | -2.356000000 | -2.272216000 |
| 6                                               | 1.708147000  | 2.692550000  | -0.365785000 |
| 1                                               | 1.236934000  | 3.000342000  | -1.303473000 |
| 1                                               | 2.758664000  | 3.011817000  | -0.397841000 |
| 1                                               | 1.217464000  | 3.240171000  | 0.444187000  |
| 6                                               | 1.703711000  | 0.484536000  | -2.674421000 |
| 1                                               | 1.209782000  | -0.299450000 | -3.254408000 |
| 1                                               | 2.752954000  | 0.530005000  | -2.995385000 |
| 1                                               | 1.231756000  | 1.434887000  | -2.938080000 |
| <b>IMe</b>                                      |              |              |              |
| 7                                               | -1.060606000 | -0.708576000 | 0.000002000  |
| 7                                               | 1.060607000  | -0.708576000 | -0.000002000 |
| 6                                               | 0.000000000  | -1.576803000 | -0.000001000 |

## SUPPORTING INFORMATION

---

|   |              |              |              |
|---|--------------|--------------|--------------|
| 6 | 0.681925000  | 0.640154000  | -0.000001000 |
| 6 | -0.681926000 | 0.640154000  | 0.000003000  |
| 6 | -2.434708000 | -1.175017000 | 0.000002000  |
| 1 | -2.402209000 | -2.264931000 | -0.000001000 |
| 1 | -2.974117000 | -0.829040000 | 0.889953000  |
| 1 | -2.974119000 | -0.829036000 | -0.889948000 |
| 6 | -1.662602000 | 1.766908000  | -0.000004000 |
| 1 | -2.314925000 | 1.745845000  | -0.883278000 |
| 1 | -2.314949000 | 1.745838000  | 0.883251000  |
| 1 | -1.142686000 | 2.729490000  | 0.000007000  |
| 6 | 2.434709000  | -1.175015000 | -0.000001000 |
| 1 | 2.402211000  | -2.264930000 | 0.000015000  |
| 1 | 2.974115000  | -0.829049000 | -0.889960000 |
| 1 | 2.974122000  | -0.829022000 | 0.889941000  |
| 6 | 1.662601000  | 1.766908000  | 0.000003000  |
| 1 | 2.314937000  | 1.745837000  | 0.883267000  |
| 1 | 2.314936000  | 1.745846000  | -0.883262000 |
| 1 | 1.142684000  | 2.729490000  | 0.000009000  |

---

**IMes**

|   |              |              |              |
|---|--------------|--------------|--------------|
| 7 | 0.000000000  | 1.064136000  | -0.589575000 |
| 7 | 0.000000000  | -1.064136000 | -0.589575000 |
| 6 | -0.000301000 | 2.435003000  | -0.156715000 |
| 6 | 1.191450000  | 3.174723000  | -0.221164000 |
| 6 | 0.000301000  | -2.435003000 | -0.156715000 |
| 6 | 0.000000000  | 0.000000000  | 0.280758000  |
| 6 | -1.191858000 | 3.001056000  | 0.324685000  |
| 6 | 2.481348000  | 2.541941000  | -0.687438000 |
| 1 | 2.683987000  | 1.615340000  | -0.138983000 |
| 1 | 3.323541000  | 3.223573000  | -0.535546000 |
| 1 | 2.451634000  | 2.279365000  | -1.751938000 |
| 6 | -1.191450000 | -3.174723000 | -0.221164000 |
| 6 | 1.191858000  | -3.001056000 | 0.324685000  |
| 6 | 0.001144000  | -0.677030000 | -1.933047000 |
| 1 | 0.007062000  | -1.388179000 | -2.745420000 |
| 6 | -0.007670000 | 5.114980000  | 0.658439000  |
| 6 | 1.162232000  | 4.511736000  | 0.187960000  |
| 1 | 2.082172000  | 5.091651000  | 0.147283000  |
| 6 | -1.169403000 | 4.339925000  | 0.726829000  |
| 1 | -2.086155000 | 4.787138000  | 1.105944000  |
| 6 | -1.162232000 | -4.511736000 | 0.187960000  |
| 1 | -2.082172000 | -5.091651000 | 0.147283000  |
| 6 | -0.001144000 | 0.677030000  | -1.933047000 |
| 1 | -0.007062000 | 1.388179000  | -2.745420000 |
| 6 | -2.457593000 | 2.184890000  | 0.425123000  |
| 1 | -2.770246000 | 1.805377000  | -0.555613000 |
| 1 | -3.276167000 | 2.785436000  | 0.833072000  |
| 1 | -2.303995000 | 1.312685000  | 1.069289000  |
| 6 | 2.457593000  | -2.184890000 | 0.425123000  |
| 1 | 2.770246000  | -1.805377000 | -0.555613000 |
| 1 | 3.276167000  | -2.785436000 | 0.833072000  |
| 1 | 2.303995000  | -1.312685000 | 1.069289000  |
| 6 | 0.007670000  | -5.114980000 | 0.658439000  |
| 6 | -2.481348000 | -2.541941000 | -0.687438000 |
| 1 | -2.683987000 | -1.615340000 | -0.138983000 |
| 1 | -3.323541000 | -3.223573000 | -0.535546000 |
| 1 | -2.451634000 | -2.279365000 | -1.751938000 |
| 6 | 1.169403000  | -4.339925000 | 0.726829000  |
| 1 | 2.086155000  | -4.787138000 | 1.105944000  |
| 6 | -0.020219000 | 6.569980000  | 1.066665000  |
| 1 | 0.953518000  | 6.885558000  | 1.456450000  |

---

## SUPPORTING INFORMATION

---

|   |              |              |             |
|---|--------------|--------------|-------------|
| 1 | -0.772735000 | 6.763251000  | 1.838527000 |
| 1 | -0.254765000 | 7.221079000  | 0.213658000 |
| 6 | 0.020219000  | -6.569980000 | 1.066665000 |
| 1 | 0.772735000  | -6.763251000 | 1.838527000 |
| 1 | 0.254765000  | -7.221079000 | 0.213658000 |
| 1 | -0.953518000 | -6.885558000 | 1.456450000 |

---

|              |              |              |              |
|--------------|--------------|--------------|--------------|
| <b>IDipp</b> |              |              |              |
| 7            | -1.031417000 | 0.000004000  | 0.515457000  |
| 7            | 1.098225000  | -0.000006000 | 0.543259000  |
| 6            | 0.693076000  | -0.000011000 | 1.880610000  |
| 1            | 1.394718000  | -0.000018000 | 2.701147000  |
| 6            | -0.661378000 | -0.000005000 | 1.862568000  |
| 1            | -1.383590000 | -0.000005000 | 2.665023000  |
| 6            | 3.135487000  | 1.234505000  | -0.047440000 |
| 6            | -3.057890000 | 1.232616000  | -0.118468000 |
| 6            | -2.404444000 | 0.000009000  | 0.079514000  |
| 6            | 0.044791000  | 0.000004000  | -0.341149000 |
| 6            | 4.482446000  | 1.206577000  | -0.428773000 |
| 1            | 5.014651000  | 2.139781000  | -0.584374000 |
| 6            | -2.351132000 | 2.571332000  | 0.065873000  |
| 1            | -1.317309000 | 2.368063000  | 0.357248000  |
| 6            | 2.482239000  | -0.000010000 | 0.139371000  |
| 6            | -3.057905000 | -1.232593000 | -0.118450000 |
| 6            | 3.135471000  | -1.234530000 | -0.047468000 |
| 6            | 2.388367000  | 2.557805000  | 0.088170000  |
| 1            | 1.540101000  | 2.393154000  | 0.761386000  |
| 6            | -2.994938000 | 3.405054000  | 1.190279000  |
| 1            | -4.035765000 | 3.660215000  | 0.958268000  |
| 1            | -2.989823000 | 2.862211000  | 2.142326000  |
| 1            | -2.446441000 | 4.343895000  | 1.332092000  |
| 6            | 5.151183000  | -0.000019000 | -0.615074000 |
| 1            | 6.197408000  | -0.000023000 | -0.910288000 |
| 6            | -4.401707000 | -1.204823000 | -0.511176000 |
| 1            | -4.928750000 | -2.141500000 | -0.671492000 |
| 6            | 4.482430000  | -1.206611000 | -0.428801000 |
| 1            | 5.014623000  | -2.139819000 | -0.584423000 |
| 6            | -2.351163000 | -2.571314000 | 0.065916000  |
| 1            | -1.317328000 | -2.368052000 | 0.357251000  |
| 6            | -4.401692000 | 1.204857000  | -0.511196000 |
| 1            | -4.928722000 | 2.141538000  | -0.671528000 |
| 6            | 2.388334000  | -2.557823000 | 0.088117000  |
| 1            | 1.540077000  | -2.393176000 | 0.761346000  |
| 6            | -2.299451000 | 3.362002000  | -1.255508000 |
| 1            | -1.803637000 | 2.779797000  | -2.038766000 |
| 1            | -3.303670000 | 3.622554000  | -1.610725000 |
| 1            | -1.742130000 | 4.296552000  | -1.118840000 |
| 6            | -5.071332000 | 0.000020000  | -0.703312000 |
| 1            | -6.114725000 | 0.000023000  | -1.008080000 |
| 6            | 3.236849000  | -3.684244000 | 0.701359000  |
| 1            | 4.047317000  | -4.002347000 | 0.035256000  |
| 1            | 3.683900000  | -3.380968000 | 1.654918000  |
| 1            | 2.609210000  | -4.563850000 | 0.885168000  |
| 6            | 1.810150000  | -2.976221000 | -1.280177000 |
| 1            | 1.151704000  | -2.194627000 | -1.672210000 |
| 1            | 2.614645000  | -3.147719000 | -2.005985000 |
| 1            | 1.234097000  | -3.905423000 | -1.187284000 |
| 6            | 3.236892000  | 3.684199000  | 0.701447000  |
| 1            | 3.683927000  | 3.380895000  | 1.655005000  |
| 1            | 4.047372000  | 4.002305000  | 0.035360000  |
| 1            | 2.609265000  | 4.563811000  | 0.885268000  |

---

## SUPPORTING INFORMATION

---

|   |              |              |              |
|---|--------------|--------------|--------------|
| 6 | 1.810204000  | 2.976243000  | -1.280121000 |
| 1 | 2.614708000  | 3.147750000  | -2.005915000 |
| 1 | 1.151754000  | 2.194665000  | -1.672180000 |
| 1 | 1.234159000  | 3.905448000  | -1.187212000 |
| 6 | -2.299538000 | -3.362038000 | -1.255435000 |
| 1 | -3.303772000 | -3.622593000 | -1.610608000 |
| 1 | -1.803744000 | -2.779872000 | -2.038735000 |
| 1 | -1.742224000 | -4.296589000 | -1.118747000 |
| 6 | -2.994950000 | -3.404982000 | 1.190374000  |
| 1 | -2.989795000 | -2.862103000 | 2.142401000  |
| 1 | -4.035789000 | -3.660129000 | 0.958404000  |
| 1 | -2.446467000 | -4.343829000 | 1.332206000  |

---

**tBu**

|   |              |              |              |
|---|--------------|--------------|--------------|
| 7 | 0.000001000  | 1.069084000  | -0.298844000 |
| 7 | -0.000001000 | -1.069084000 | -0.298844000 |
| 6 | 0.000000000  | -0.678434000 | -1.636250000 |
| 1 | -0.000004000 | -1.364774000 | -2.467255000 |
| 6 | 0.000000000  | 0.678434000  | -1.636250000 |
| 1 | 0.000004000  | 1.364774000  | -2.467255000 |
| 6 | -0.000009000 | 2.466826000  | 0.221488000  |
| 6 | 0.000000000  | 0.000000000  | 0.554851000  |
| 6 | 0.000009000  | -2.466826000 | 0.221488000  |
| 6 | 0.000001000  | 3.469145000  | -0.940204000 |
| 1 | 0.890696000  | 3.363388000  | -1.569538000 |
| 1 | -0.890680000 | 3.363387000  | -1.569557000 |
| 1 | -0.000004000 | 4.485741000  | -0.534352000 |
| 6 | 1.262949000  | 2.659148000  | 1.079639000  |
| 1 | 2.166590000  | 2.542879000  | 0.470256000  |
| 1 | 1.273362000  | 3.660519000  | 1.525405000  |
| 1 | 1.287808000  | 1.910909000  | 1.875567000  |
| 6 | -1.262982000 | 2.659144000  | 1.079610000  |
| 1 | -1.273424000 | 3.660527000  | 1.525349000  |
| 1 | -2.166612000 | 2.542843000  | 0.470217000  |
| 1 | -1.287849000 | 1.910929000  | 1.875562000  |
| 6 | -0.000001000 | -3.469145000 | -0.940204000 |
| 1 | 0.890680000  | -3.363387000 | -1.569557000 |
| 1 | 0.000004000  | -4.485741000 | -0.534352000 |
| 1 | -0.890696000 | -3.363388000 | -1.569538000 |
| 6 | 1.262982000  | -2.659144000 | 1.079610000  |
| 1 | 2.166612000  | -2.542843000 | 0.470217000  |
| 1 | 1.287849000  | -1.910929000 | 1.875562000  |
| 1 | 1.273424000  | -3.660527000 | 1.525349000  |
| 6 | -1.262949000 | -2.659148000 | 1.079639000  |
| 1 | -1.273362000 | -3.660519000 | 1.525405000  |
| 1 | -1.287808000 | -1.910909000 | 1.875567000  |
| 1 | -2.166590000 | -2.542879000 | 0.470256000  |

---

**IDipp=CH<sub>2</sub>**

|   |              |              |              |
|---|--------------|--------------|--------------|
| 7 | -1.107513000 | 0.000000000  | -0.580374000 |
| 7 | 1.107513000  | 0.000000000  | -0.580374000 |
| 6 | 0.672941000  | 0.000000000  | -1.916539000 |
| 1 | 1.380385000  | 0.000000000  | -2.730545000 |
| 6 | -0.672941000 | 0.000000000  | -1.916539000 |
| 1 | -1.380385000 | 0.000000000  | -2.730545000 |
| 6 | 3.124521000  | -1.233148000 | 0.065021000  |
| 6 | -3.124521000 | -1.233148000 | 0.065021000  |
| 6 | -2.470071000 | 0.000000000  | -0.146571000 |
| 6 | 0.000000000  | 0.000000000  | 0.280484000  |
| 6 | 4.457603000  | -1.205780000 | 0.492091000  |
| 1 | 4.982399000  | -2.141962000 | 0.663143000  |
| 6 | -2.419545000 | -2.569402000 | -0.142542000 |

---

## SUPPORTING INFORMATION

---

|   |              |              |              |
|---|--------------|--------------|--------------|
| 1 | -1.421768000 | -2.359829000 | -0.538423000 |
| 6 | 2.470071000  | 0.000000000  | -0.146571000 |
| 6 | -3.124521000 | 1.233148000  | 0.065021000  |
| 6 | 3.124521000  | 1.233148000  | 0.065021000  |
| 6 | 2.419545000  | -2.569402000 | -0.142542000 |
| 1 | 1.421768000  | -2.359829000 | -0.538423000 |
| 6 | -3.148488000 | -3.448647000 | -1.176330000 |
| 1 | -4.154362000 | -3.724727000 | -0.838664000 |
| 1 | -3.249755000 | -2.933278000 | -2.138153000 |
| 1 | -2.590908000 | -4.377391000 | -1.345857000 |
| 6 | 5.120057000  | 0.000000000  | 0.704504000  |
| 1 | 6.154870000  | 0.000000000  | 1.037567000  |
| 6 | -4.457603000 | 1.205780000  | 0.492091000  |
| 1 | -4.982399000 | 2.141962000  | 0.663143000  |
| 6 | 4.457603000  | 1.205780000  | 0.492091000  |
| 1 | 4.982399000  | 2.141962000  | 0.663143000  |
| 6 | -2.419545000 | 2.569402000  | -0.142542000 |
| 1 | -1.421768000 | 2.359829000  | -0.538423000 |
| 6 | -4.457603000 | -1.205780000 | 0.492091000  |
| 1 | -4.982399000 | -2.141962000 | 0.663143000  |
| 6 | 2.419545000  | 2.569402000  | -0.142542000 |
| 1 | 1.421768000  | 2.359829000  | -0.538423000 |
| 6 | -2.233624000 | -3.314824000 | 1.193533000  |
| 1 | -1.657312000 | -2.706958000 | 1.898174000  |
| 1 | -3.198204000 | -3.557191000 | 1.656054000  |
| 1 | -1.694029000 | -4.256189000 | 1.033323000  |
| 6 | -5.120057000 | 0.000000000  | 0.704504000  |
| 1 | -6.154870000 | 0.000000000  | 1.037567000  |
| 6 | 3.148488000  | 3.448647000  | -1.176330000 |
| 1 | 4.154362000  | 3.724727000  | -0.838664000 |
| 1 | 3.249755000  | 2.933278000  | -2.138153000 |
| 1 | 2.590908000  | 4.377391000  | -1.345857000 |
| 6 | 2.233624000  | 3.314824000  | 1.193533000  |
| 1 | 1.657312000  | 2.706958000  | 1.898174000  |
| 1 | 3.198204000  | 3.557191000  | 1.656054000  |
| 1 | 1.694029000  | 4.256189000  | 1.033323000  |
| 6 | 3.148488000  | -3.448647000 | -1.176330000 |
| 1 | 3.249755000  | -2.933278000 | -2.138153000 |
| 1 | 4.154362000  | -3.724727000 | -0.838664000 |
| 1 | 2.590908000  | -4.377391000 | -1.345857000 |
| 6 | 2.233624000  | -3.314824000 | 1.193533000  |
| 1 | 3.198204000  | -3.557191000 | 1.656054000  |
| 1 | 1.657312000  | -2.706958000 | 1.898174000  |
| 1 | 1.694029000  | -4.256189000 | 1.033323000  |
| 6 | -2.233624000 | 3.314824000  | 1.193533000  |
| 1 | -3.198204000 | 3.557191000  | 1.656054000  |
| 1 | -1.657312000 | 2.706958000  | 1.898174000  |
| 1 | -1.694029000 | 4.256189000  | 1.033323000  |
| 6 | -3.148488000 | 3.448647000  | -1.176330000 |
| 1 | -3.249755000 | 2.933278000  | -2.138153000 |
| 1 | -4.154362000 | 3.724727000  | -0.838664000 |
| 1 | -2.590908000 | 4.377391000  | -1.345857000 |
| 6 | 0.000000000  | 0.000000000  | 1.639328000  |
| 1 | -0.932042000 | 0.000000000  | 2.187351000  |
| 1 | 0.932042000  | 0.000000000  | 2.187351000  |

---

|              |              |              |              |
|--------------|--------------|--------------|--------------|
| <b>1•IMe</b> |              |              |              |
| 26           | -1.720096000 | -0.040406000 | -0.097607000 |
| 15           | 0.072570000  | 1.499731000  | -0.356636000 |
| 15           | 1.154619000  | 0.337982000  | 1.186607000  |
| 15           | -0.143610000 | -1.434909000 | 1.011489000  |

---

## SUPPORTING INFORMATION

---

|    |              |              |              |
|----|--------------|--------------|--------------|
| 15 | -0.350446000 | 0.159529000  | -2.019846000 |
| 15 | -0.504500000 | -1.790120000 | -1.113912000 |
| 7  | 3.730783000  | 1.131305000  | 0.297400000  |
| 7  | 3.639268000  | -1.032435000 | 0.301858000  |
| 6  | -3.096164000 | 1.288698000  | 0.768904000  |
| 6  | -3.180734000 | 0.011545000  | 1.404686000  |
| 6  | -3.363277000 | 1.111434000  | -0.629220000 |
| 6  | -3.503041000 | -0.965370000 | 0.403690000  |
| 6  | -3.617141000 | -0.283337000 | -0.855275000 |
| 6  | 4.917147000  | -0.682567000 | -0.138455000 |
| 6  | 2.907867000  | 0.081050000  | 0.558494000  |
| 6  | 4.971673000  | 0.681204000  | -0.150305000 |
| 6  | -4.027676000 | -0.903502000 | -2.159809000 |
| 1  | -3.579013000 | -0.382608000 | -3.010813000 |
| 1  | -5.119441000 | -0.867680000 | -2.280799000 |
| 1  | -3.718089000 | -1.950825000 | -2.221333000 |
| 6  | 3.353516000  | 2.536110000  | 0.452633000  |
| 1  | 2.736772000  | 2.864011000  | -0.387788000 |
| 1  | 4.259510000  | 3.139119000  | 0.515576000  |
| 1  | 2.776976000  | 2.651303000  | 1.373110000  |
| 6  | -3.772197000 | -2.421425000 | 0.653740000  |
| 1  | -3.569680000 | -3.025563000 | -0.235345000 |
| 1  | -4.821978000 | -2.582423000 | 0.937278000  |
| 1  | -3.147898000 | -2.813117000 | 1.463213000  |
| 6  | -3.050650000 | -0.247139000 | 2.878604000  |
| 1  | -2.671924000 | -1.252944000 | 3.078970000  |
| 1  | -4.026647000 | -0.149453000 | 3.375482000  |
| 1  | -2.364852000 | 0.460281000  | 3.354537000  |
| 6  | -3.455991000 | 2.210248000  | -1.648628000 |
| 1  | -2.726268000 | 3.002889000  | -1.453688000 |
| 1  | -4.454820000 | 2.669223000  | -1.639332000 |
| 1  | -3.268570000 | 1.837217000  | -2.659425000 |
| 6  | 3.219525000  | -2.419029000 | 0.502058000  |
| 1  | 3.432025000  | -2.997495000 | -0.399774000 |
| 1  | 2.148374000  | -2.446012000 | 0.696731000  |
| 1  | 3.758005000  | -2.851898000 | 1.350939000  |
| 6  | 6.076422000  | 1.604306000  | -0.546458000 |
| 1  | 5.771791000  | 2.279755000  | -1.354628000 |
| 1  | 6.934291000  | 1.029577000  | -0.903264000 |
| 1  | 6.420302000  | 2.221321000  | 0.292969000  |
| 6  | -2.868620000 | 2.602635000  | 1.460615000  |
| 1  | -2.224845000 | 2.493385000  | 2.338623000  |
| 1  | -3.823836000 | 3.029013000  | 1.799331000  |
| 1  | -2.394410000 | 3.330430000  | 0.796761000  |
| 6  | 5.942381000  | -1.704112000 | -0.503968000 |
| 1  | 6.168006000  | -2.374144000 | 0.334505000  |
| 1  | 6.874625000  | -1.215464000 | -0.796591000 |
| 1  | 5.615993000  | -2.327107000 | -1.345642000 |

---

**1•IMes**

|    |              |              |              |
|----|--------------|--------------|--------------|
| 26 | -2.482779000 | 0.000075000  | -0.080739000 |
| 15 | 0.493850000  | -0.000013000 | 0.757701000  |
| 15 | -0.752160000 | -1.641975000 | 0.015138000  |
| 15 | -0.752063000 | 1.642020000  | 0.015133000  |
| 15 | -1.516084000 | -1.077167000 | -1.947634000 |
| 15 | -1.516019000 | 1.077251000  | -1.947638000 |
| 7  | 3.034632000  | -1.086698000 | -0.183073000 |
| 7  | 3.034699000  | 1.086515000  | -0.183073000 |
| 6  | 2.686262000  | -2.485955000 | -0.046368000 |
| 6  | 2.387545000  | -3.220006000 | -1.205084000 |
| 6  | 2.686416000  | 2.485793000  | -0.046368000 |

---

## SUPPORTING INFORMATION

---

|   |              |              |              |
|---|--------------|--------------|--------------|
| 6 | 2.239562000  | -0.000067000 | 0.033190000  |
| 6 | 2.739309000  | -3.072110000 | 1.227648000  |
| 6 | 2.315857000  | -2.572156000 | -2.566115000 |
| 1 | 1.446293000  | -1.906753000 | -2.631100000 |
| 1 | 2.210882000  | -3.331104000 | -3.346214000 |
| 1 | 3.206420000  | -1.975321000 | -2.793575000 |
| 6 | 2.739498000  | 3.071944000  | 1.227649000  |
| 6 | 2.387749000  | 3.219865000  | -1.205083000 |
| 6 | 4.315400000  | 0.676629000  | -0.536969000 |
| 1 | 5.091979000  | 1.393949000  | -0.750276000 |
| 6 | 2.138384000  | -5.206669000 | 0.199112000  |
| 6 | 2.121563000  | -4.582945000 | -1.052003000 |
| 1 | 1.881303000  | -5.168201000 | -1.936438000 |
| 6 | 2.455804000  | -4.437043000 | 1.322079000  |
| 1 | 2.485397000  | -4.908895000 | 2.301484000  |
| 6 | 2.456080000  | 4.436894000  | 1.322081000  |
| 1 | 2.485702000  | 4.908744000  | 2.301487000  |
| 6 | 4.315358000  | -0.676891000 | -0.536968000 |
| 1 | 5.091894000  | -1.394259000 | -0.750275000 |
| 6 | -4.498786000 | 0.000158000  | -0.497824000 |
| 6 | 3.083174000  | -2.270386000 | 2.460061000  |
| 1 | 4.028915000  | -1.727107000 | 2.344404000  |
| 1 | 3.177260000  | -2.926388000 | 3.329917000  |
| 1 | 2.305577000  | -1.528945000 | 2.679777000  |
| 6 | 2.316024000  | 2.572022000  | -2.566116000 |
| 1 | 3.206547000  | 1.975124000  | -2.793572000 |
| 1 | 2.211107000  | 3.330978000  | -3.346215000 |
| 1 | 1.446414000  | 1.906679000  | -2.631106000 |
| 6 | 2.138713000  | 5.206542000  | 0.199113000  |
| 6 | -3.620714000 | 0.714506000  | 1.526867000  |
| 6 | -4.163159000 | 1.161720000  | 0.276437000  |
| 6 | 3.083311000  | 2.270197000  | 2.460061000  |
| 1 | 2.305675000  | 1.528793000  | 2.679767000  |
| 1 | 3.177422000  | 2.926190000  | 3.329921000  |
| 1 | 4.029027000  | 1.726872000  | 2.344411000  |
| 6 | 2.121856000  | 4.582821000  | -1.052002000 |
| 1 | 1.881637000  | 5.168093000  | -1.936437000 |
| 6 | -4.163251000 | -1.161455000 | 0.276399000  |
| 6 | 1.797434000  | -6.671390000 | 0.335960000  |
| 1 | 2.103376000  | -7.239595000 | -0.548769000 |
| 1 | 0.714646000  | -6.808998000 | 0.452980000  |
| 1 | 2.280004000  | -7.116797000 | 1.212121000  |
| 6 | -3.620772000 | -0.714326000 | 1.526844000  |
| 6 | 1.797857000  | 6.671286000  | 0.335963000  |
| 1 | 0.715080000  | 6.808961000  | 0.452999000  |
| 1 | 2.103822000  | 7.239469000  | -0.548772000 |
| 1 | 2.280468000  | 7.116664000  | 1.212116000  |
| 6 | -4.427050000 | 2.591003000  | -0.101206000 |
| 1 | -3.653996000 | 3.260204000  | 0.290042000  |
| 1 | -5.392749000 | 2.929355000  | 0.300809000  |
| 1 | -4.453409000 | 2.722831000  | -1.186595000 |
| 6 | -3.224411000 | 1.587910000  | 2.682822000  |
| 1 | -2.398635000 | 1.152102000  | 3.253573000  |
| 1 | -4.071159000 | 1.722412000  | 3.371534000  |
| 1 | -2.904667000 | 2.578762000  | 2.349783000  |
| 6 | -5.176194000 | 0.000208000  | -1.838115000 |
| 1 | -4.902595000 | 0.880735000  | -2.426845000 |
| 1 | -6.269236000 | 0.000287000  | -1.722281000 |
| 1 | -4.902723000 | -0.880357000 | -2.426845000 |
| 6 | -3.224538000 | -1.587800000 | 2.682769000  |
| 1 | -2.904839000 | -2.578655000 | 2.349696000  |

---



## SUPPORTING INFORMATION

---

|   |              |              |              |
|---|--------------|--------------|--------------|
| 1 | -4.071306000 | -1.722285000 | 3.371459000  |
| 1 | -2.398749000 | -1.152058000 | 3.253554000  |
| 6 | -4.427253000 | -2.590705000 | -0.101293000 |
| 1 | -4.453563000 | -2.722505000 | -1.186687000 |
| 1 | -5.393005000 | -2.928977000 | 0.300659000  |
| 1 | -3.654283000 | -3.259985000 | 0.289982000  |

---

## 1•IDipp

|    |              |              |              |
|----|--------------|--------------|--------------|
| 26 | -2.922441000 | 0.000009000  | 0.167590000  |
| 15 | 0.017436000  | 0.000229000  | -0.638304000 |
| 15 | -1.191578000 | 1.649187000  | 0.122535000  |
| 15 | -1.191432000 | -1.648982000 | 0.122212000  |
| 15 | -2.004773000 | -1.074580000 | 2.061233000  |
| 15 | -2.004936000 | 1.074372000  | 2.061409000  |
| 7  | 2.669711000  | -1.086519000 | -0.060462000 |
| 7  | 2.669852000  | 1.086560000  | -0.060295000 |
| 6  | 3.996356000  | 0.676512000  | 0.006058000  |
| 1  | 4.801340000  | 1.392123000  | 0.049364000  |
| 6  | 3.996276000  | -0.676623000 | 0.005927000  |
| 1  | 4.801158000  | -1.392345000 | 0.049247000  |
| 6  | 2.234832000  | 3.166389000  | 1.166187000  |
| 6  | 2.235184000  | -3.166431000 | 1.166023000  |
| 6  | 2.303978000  | -2.491545000 | -0.069146000 |
| 6  | 1.844685000  | 0.000078000  | -0.107734000 |
| 6  | 1.968183000  | 4.539477000  | 1.127771000  |
| 1  | 1.902274000  | 5.094058000  | 2.058391000  |
| 6  | 2.475145000  | -2.472244000 | 2.504381000  |
| 1  | 2.431058000  | -1.390189000 | 2.339560000  |
| 6  | 2.304092000  | 2.491570000  | -0.069014000 |
| 6  | 2.123796000  | -3.134394000 | -1.308854000 |
| 6  | 2.124232000  | 3.134452000  | -1.308735000 |
| 6  | 2.474572000  | 2.472084000  | 2.504527000  |
| 1  | 2.430213000  | 1.390046000  | 2.339641000  |
| 6  | -4.015961000 | 0.714331000  | -1.470069000 |
| 6  | 3.880285000  | -2.805636000 | 3.048926000  |
| 1  | 3.981490000  | -3.880859000 | 3.238019000  |
| 1  | 4.672002000  | -2.516481000 | 2.348224000  |
| 1  | 4.058512000  | -2.280142000 | 3.994366000  |
| 6  | 1.779118000  | 5.203800000  | -0.080264000 |
| 1  | 1.568732000  | 6.269862000  | -0.084302000 |
| 6  | 1.857630000  | -4.508181000 | -1.282521000 |
| 1  | 1.709579000  | -5.038574000 | -2.218105000 |
| 6  | -4.593134000 | 1.161451000  | -0.234973000 |
| 6  | 1.857895000  | 4.508224000  | -1.282415000 |
| 1  | 1.710096000  | 5.038643000  | -2.218024000 |
| 6  | 2.247495000  | -2.408557000 | -2.645524000 |
| 1  | 2.281089000  | -1.332524000 | -2.449512000 |
| 6  | 1.968718000  | -4.539573000 | 1.127620000  |
| 1  | 1.903201000  | -5.094194000 | 2.058246000  |
| 6  | 2.248308000  | 2.408724000  | -2.645443000 |
| 1  | 2.282717000  | 1.332708000  | -2.449456000 |
| 6  | 1.396438000  | -2.808521000 | 3.549937000  |
| 1  | 0.393679000  | -2.589872000 | 3.172796000  |
| 1  | 1.430784000  | -3.862988000 | 3.847268000  |
| 1  | 1.558498000  | -2.210092000 | 4.453706000  |
| 6  | -4.015854000 | -0.714189000 | -1.470215000 |
| 6  | 1.779335000  | -5.203848000 | -0.080373000 |
| 1  | 1.569085000  | -6.269937000 | -0.084422000 |
| 6  | -4.866206000 | 2.590937000  | 0.135583000  |
| 1  | -4.925614000 | 2.722017000  | 1.219763000  |
| 1  | -4.080158000 | 3.259191000  | -0.230670000 |

---

## SUPPORTING INFORMATION

---

|   |              |              |              |
|---|--------------|--------------|--------------|
| 1 | -5.818428000 | 2.931258000  | -0.295721000 |
| 6 | -3.583222000 | 1.585801000  | -2.614117000 |
| 1 | -3.283268000 | 2.580335000  | -2.273716000 |
| 1 | -2.733513000 | 1.152029000  | -3.150613000 |
| 1 | -4.403719000 | 1.711427000  | -3.335459000 |
| 6 | 3.562305000  | 2.792969000  | -3.356105000 |
| 1 | 3.586194000  | 3.863364000  | -3.591952000 |
| 1 | 4.437334000  | 2.569730000  | -2.734637000 |
| 1 | 3.664394000  | 2.239528000  | -4.296910000 |
| 6 | -4.951610000 | -0.000189000 | 0.528412000  |
| 6 | 1.033159000  | 2.651916000  | -3.559470000 |
| 1 | 0.102530000  | 2.364324000  | -3.061014000 |
| 1 | 0.951807000  | 3.702864000  | -3.859829000 |
| 1 | 1.130611000  | 2.055649000  | -4.474116000 |
| 6 | 3.879830000  | 2.805089000  | 3.049050000  |
| 1 | 4.671443000  | 2.515691000  | 2.348334000  |
| 1 | 3.981321000  | 3.880288000  | 3.238117000  |
| 1 | 4.057927000  | 2.279553000  | 3.994493000  |
| 6 | 1.396023000  | 2.808595000  | 3.550142000  |
| 1 | 1.430776000  | 3.862995000  | 3.847671000  |
| 1 | 0.393167000  | 2.590377000  | 3.173004000  |
| 1 | 1.557885000  | 2.209959000  | 4.453809000  |
| 6 | -4.592973000 | -1.161623000 | -0.235207000 |
| 6 | 1.032666000  | -2.652573000 | -3.559748000 |
| 1 | 0.952205000  | -3.703530000 | -3.860339000 |
| 1 | 0.101726000  | -2.365819000 | -3.061385000 |
| 1 | 1.129766000  | -2.056059000 | -4.474269000 |
| 6 | -5.665721000 | -0.000415000 | 1.849486000  |
| 1 | -5.408372000 | -0.880839000 | 2.445590000  |
| 1 | -5.409153000 | 0.880329000  | 2.445450000  |
| 1 | -6.755081000 | -0.000924000 | 1.703254000  |
| 6 | -3.582979000 | -1.585287000 | -2.614500000 |
| 1 | -2.732392000 | -1.151988000 | -3.149984000 |
| 1 | -3.284274000 | -2.580336000 | -2.274518000 |
| 1 | -4.402991000 | -1.709640000 | -3.336609000 |
| 6 | 3.561845000  | -2.791897000 | -3.356036000 |
| 1 | 4.436665000  | -2.568003000 | -2.734514000 |
| 1 | 3.586483000  | -3.862298000 | -3.591789000 |
| 1 | 3.663624000  | -2.238452000 | -4.296872000 |
| 6 | -4.865738000 | -2.591167000 | 0.135339000  |
| 1 | -4.080166000 | -3.259405000 | -0.231950000 |
| 1 | -4.923896000 | -2.722455000 | 1.219560000  |
| 1 | -5.818487000 | -2.931340000 | -0.294925000 |

---

**1•I'Bu**

|    |              |              |              |
|----|--------------|--------------|--------------|
| 26 | 2.046498000  | -0.018935000 | -0.112880000 |
| 15 | -0.961251000 | 0.070096000  | 0.988145000  |
| 15 | 0.289853000  | 1.523982000  | -0.134012000 |
| 15 | 0.397634000  | -1.595284000 | 0.412677000  |
| 15 | 0.883995000  | 0.696237000  | -2.052296000 |
| 15 | 0.970490000  | -1.424915000 | -1.678503000 |
| 7  | -3.451073000 | 1.104281000  | -0.207119000 |
| 7  | -3.453249000 | -1.093194000 | -0.200810000 |
| 6  | -2.747896000 | 0.005271000  | 0.233750000  |
| 6  | -4.488467000 | -0.670185000 | -1.018693000 |
| 1  | -5.152276000 | -1.352901000 | -1.517791000 |
| 6  | -4.484631000 | 0.677596000  | -1.025215000 |
| 1  | -5.142757000 | 1.359271000  | -1.533962000 |
| 6  | 4.022551000  | -0.061092000 | -0.694815000 |
| 6  | 3.336167000  | -0.411243000 | 1.493914000  |
| 6  | 3.787094000  | -1.068360000 | 0.301385000  |

---

## SUPPORTING INFORMATION

---

|   |              |              |              |
|---|--------------|--------------|--------------|
| 6 | 3.716177000  | 1.215734000  | -0.114654000 |
| 6 | 3.292564000  | 0.994991000  | 1.237557000  |
| 6 | 4.056811000  | -2.539177000 | 0.160426000  |
| 1 | 3.341541000  | -3.136393000 | 0.735081000  |
| 1 | 5.064170000  | -2.788568000 | 0.522798000  |
| 1 | 3.986733000  | -2.862413000 | -0.882116000 |
| 6 | 3.053114000  | -1.077436000 | 2.810032000  |
| 1 | 2.313804000  | -0.521252000 | 3.394216000  |
| 1 | 3.969882000  | -1.147588000 | 3.412948000  |
| 1 | 2.664377000  | -2.090329000 | 2.672905000  |
| 6 | 4.587018000  | -0.293582000 | -2.066946000 |
| 1 | 4.291447000  | -1.269692000 | -2.462638000 |
| 1 | 5.685307000  | -0.257391000 | -2.047084000 |
| 1 | 4.240613000  | 0.462426000  | -2.777762000 |
| 6 | 2.955292000  | 2.063354000  | 2.238381000  |
| 1 | 2.500050000  | 2.934492000  | 1.758742000  |
| 1 | 3.860523000  | 2.401860000  | 2.762548000  |
| 1 | 2.250915000  | 1.700947000  | 2.993282000  |
| 6 | 3.901864000  | 2.555807000  | -0.767150000 |
| 1 | 3.809593000  | 2.490137000  | -1.855035000 |
| 1 | 4.895660000  | 2.966452000  | -0.538741000 |
| 1 | 3.157727000  | 3.279895000  | -0.420125000 |
| 6 | -3.366192000 | -2.556154000 | 0.216955000  |
| 6 | -3.391875000 | 2.576926000  | 0.192124000  |
| 6 | -4.805190000 | -3.118311000 | 0.281517000  |
| 1 | -5.268359000 | -3.227898000 | -0.703271000 |
| 1 | -4.756563000 | -4.119931000 | 0.718073000  |
| 1 | -5.454270000 | -2.504375000 | 0.914777000  |
| 6 | -2.563980000 | -3.337505000 | -0.832886000 |
| 1 | -2.535416000 | -4.396517000 | -0.554336000 |
| 1 | -3.037941000 | -3.257886000 | -1.817751000 |
| 1 | -1.538557000 | -2.974743000 | -0.908009000 |
| 6 | -2.776826000 | -2.676242000 | 1.629279000  |
| 1 | -3.333145000 | -2.057149000 | 2.341101000  |
| 1 | -2.862733000 | -3.719868000 | 1.947489000  |
| 1 | -1.720081000 | -2.416810000 | 1.672643000  |
| 6 | -4.845429000 | 3.041500000  | 0.448318000  |
| 1 | -5.456059000 | 3.074877000  | -0.457865000 |
| 1 | -5.344470000 | 2.404835000  | 1.186425000  |
| 1 | -4.814006000 | 4.060334000  | 0.844710000  |
| 6 | -2.623171000 | 2.787561000  | 1.503521000  |
| 1 | -2.989031000 | 2.125826000  | 2.294692000  |
| 1 | -1.549203000 | 2.651596000  | 1.391246000  |
| 1 | -2.787938000 | 3.821340000  | 1.823862000  |
| 6 | -2.779396000 | 3.382149000  | -0.963539000 |
| 1 | -2.797574000 | 4.447899000  | -0.710689000 |
| 1 | -1.742707000 | 3.088384000  | -1.142343000 |
| 1 | -3.352360000 | 3.244472000  | -1.887371000 |

---

**1•IDipp=CH<sub>2</sub>**

|    |              |              |              |
|----|--------------|--------------|--------------|
| 26 | -3.483218000 | -0.000098000 | -0.449051000 |
| 15 | -0.533729000 | 0.000059000  | 0.311609000  |
| 15 | -1.740801000 | -1.648107000 | -0.437857000 |
| 15 | -1.740848000 | 1.648078000  | -0.438241000 |
| 15 | -2.585421000 | 1.074736000  | -2.361418000 |
| 15 | -2.585267000 | -1.075301000 | -2.361269000 |
| 7  | 3.040603000  | -1.092345000 | 0.622478000  |
| 7  | 3.040522000  | 1.092398000  | 0.622572000  |
| 6  | 4.107513000  | 0.676617000  | 1.413716000  |
| 1  | 4.759273000  | 1.389382000  | 1.891220000  |
| 6  | 4.107531000  | -0.676551000 | 1.413704000  |

---

## SUPPORTING INFORMATION

---

|   |              |              |              |
|---|--------------|--------------|--------------|
| 1 | 4.759353000  | -1.389309000 | 1.891129000  |
| 6 | 2.000907000  | 3.223303000  | 1.277141000  |
| 6 | 2.001332000  | -3.223338000 | 1.277233000  |
| 6 | 2.742984000  | -2.481828000 | 0.333612000  |
| 6 | 2.394485000  | 0.000024000  | 0.122446000  |
| 6 | 1.770667000  | 4.572887000  | 0.986126000  |
| 1 | 1.198987000  | 5.175664000  | 1.683717000  |
| 6 | 1.499874000  | -2.625266000 | 2.589422000  |
| 1 | 1.484275000  | -1.535747000 | 2.480299000  |
| 6 | 2.742825000  | 2.481860000  | 0.333667000  |
| 6 | 3.252841000  | -3.043516000 | -0.855062000 |
| 6 | 3.252874000  | 3.043604000  | -0.854892000 |
| 6 | 1.499298000  | 2.625209000  | 2.589263000  |
| 1 | 1.483665000  | 1.535699000  | 2.480108000  |
| 6 | -4.568566000 | -0.714492000 | 1.191496000  |
| 6 | 2.457447000  | -2.976504000 | 3.748439000  |
| 1 | 2.502122000  | -4.061268000 | 3.902033000  |
| 1 | 3.479149000  | -2.626075000 | 3.563373000  |
| 1 | 2.108824000  | -2.518636000 | 4.681276000  |
| 6 | 2.249104000  | 5.152965000  | -0.184618000 |
| 1 | 2.047917000  | 6.200582000  | -0.390573000 |
| 6 | 2.982313000  | -4.396122000 | -1.092643000 |
| 1 | 3.353771000  | -4.861487000 | -2.000719000 |
| 6 | -5.149994000 | -1.161653000 | -0.041112000 |
| 6 | 2.982218000  | 4.396177000  | -1.092544000 |
| 1 | 3.353826000  | 4.861579000  | -2.000541000 |
| 6 | 4.101663000  | -2.259805000 | -1.852586000 |
| 1 | 4.121348000  | -1.210906000 | -1.540261000 |
| 6 | 1.771217000  | -4.572963000 | 0.986286000  |
| 1 | 1.199756000  | -5.175798000 | 1.684003000  |
| 6 | 4.102053000  | 2.260034000  | -1.852225000 |
| 1 | 4.122196000  | 1.211211000  | -1.539664000 |
| 6 | 0.063180000  | -3.055538000 | 2.934626000  |
| 1 | -0.623785000 | -2.850646000 | 2.108894000  |
| 1 | 0.003041000  | -4.122231000 | 3.180525000  |
| 1 | -0.283532000 | -2.499937000 | 3.813042000  |
| 6 | -4.568339000 | 0.714461000  | 1.191511000  |
| 6 | 2.249497000  | -5.152997000 | -0.184540000 |
| 1 | 2.048419000  | -6.200647000 | -0.390434000 |
| 6 | -5.421713000 | -2.590921000 | -0.412896000 |
| 1 | -5.483656000 | -2.719878000 | -1.497157000 |
| 1 | -4.632448000 | -3.257659000 | -0.050978000 |
| 1 | -6.372038000 | -2.934097000 | 0.020678000  |
| 6 | -4.130240000 | -1.586881000 | 2.332560000  |
| 1 | -3.826648000 | -2.578820000 | 1.987707000  |
| 1 | -3.280505000 | -1.151573000 | 2.867503000  |
| 1 | -4.948653000 | -1.718519000 | 3.055512000  |
| 6 | 5.560864000  | 2.760935000  | -1.843945000 |
| 1 | 5.623352000  | 3.808767000  | -2.158991000 |
| 1 | 6.004543000  | 2.687106000  | -0.844610000 |
| 1 | 6.172910000  | 2.166930000  | -2.532631000 |
| 6 | -5.509785000 | 0.000167000  | -0.804023000 |
| 6 | 3.513657000  | 2.297595000  | -3.275433000 |
| 1 | 2.481548000  | 1.932995000  | -3.294272000 |
| 1 | 3.516302000  | 3.312549000  | -3.688010000 |
| 1 | 4.109858000  | 1.668133000  | -3.946102000 |
| 6 | 2.456774000  | 2.976400000  | 3.748380000  |
| 1 | 3.478495000  | 2.625967000  | 3.563400000  |
| 1 | 2.501452000  | 4.061159000  | 3.902010000  |
| 1 | 2.108061000  | 2.518510000  | 4.681173000  |
| 6 | 0.062605000  | 3.055551000  | 2.934372000  |

---

SUPPORTING INFORMATION

---

|   |              |              |              |
|---|--------------|--------------|--------------|
| 1 | 0.002570000  | 4.122195000  | 3.180532000  |
| 1 | -0.624291000 | 2.850956000  | 2.108507000  |
| 1 | -0.284292000 | 2.499774000  | 3.812599000  |
| 6 | -5.149685000 | 1.161838000  | -0.041079000 |
| 6 | 3.513274000  | -2.297911000 | -3.275782000 |
| 1 | 3.516739000  | -3.312880000 | -3.688327000 |
| 1 | 2.480876000  | -1.934131000 | -3.294630000 |
| 1 | 4.108974000  | -1.668007000 | -3.946478000 |
| 6 | -6.227784000 | 0.000120000  | -2.122933000 |
| 1 | -5.972968000 | 0.881176000  | -2.719105000 |
| 1 | -5.970676000 | -0.879443000 | -2.720330000 |
| 1 | -7.316837000 | -0.001407000 | -1.973492000 |
| 6 | -4.129632000 | 1.586746000  | 2.332499000  |
| 1 | -3.281196000 | 1.150203000  | 2.868505000  |
| 1 | -3.823878000 | 2.577927000  | 1.987343000  |
| 1 | -4.948514000 | 1.720295000  | 3.054574000  |
| 6 | 5.560679000  | -2.760098000 | -1.844219000 |
| 1 | 6.004395000  | -2.685754000 | -0.844936000 |
| 1 | 5.623559000  | -3.808014000 | -2.158912000 |
| 1 | 6.172453000  | -2.166081000 | -2.533139000 |
| 6 | -5.420975000 | 2.591233000  | -0.412695000 |
| 1 | -4.631537000 | 3.257682000  | -0.050641000 |
| 1 | -5.482818000 | 2.720374000  | -1.496940000 |
| 1 | -6.371217000 | 2.934613000  | 0.020890000  |
| 6 | 1.219804000  | -0.000031000 | -0.727557000 |
| 1 | 1.178835000  | -0.895063000 | -1.347598000 |
| 1 | 1.178826000  | 0.894895000  | -1.347764000 |

---

## SUPPORTING INFORMATION

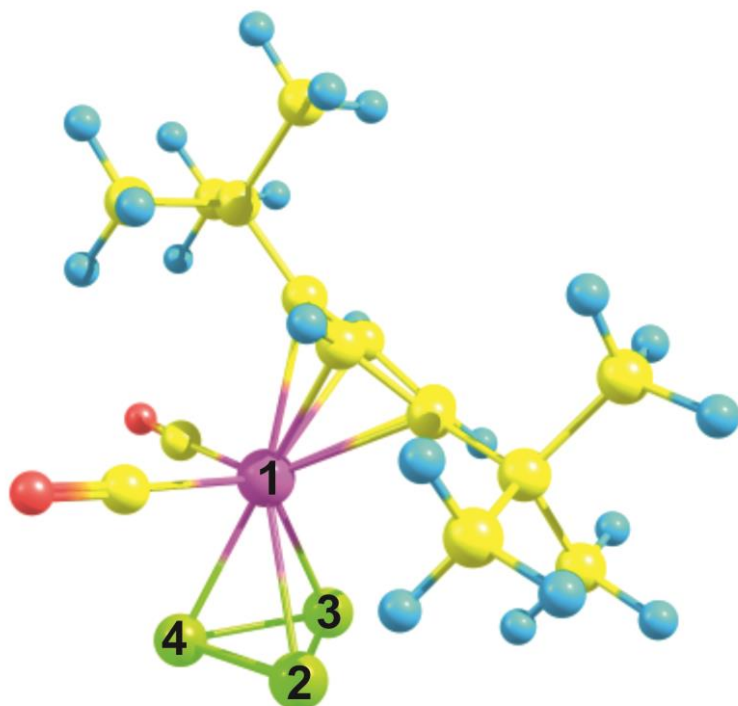

**Figure S 10.** Molecule model of  $[\text{Cp}''\text{Ta}(\text{CO})_2(\eta^3\text{-P}_3)]^-$  used for WBI calculations.

**Table S 6.** Wiberg bond indexes (WBI) for selected bonds in  $[\text{Cp}''\text{Ta}(\text{CO})_2(\eta^3\text{-P}_3)]^-$ . B3LYP/def2-SVPD level of theory.

| Bond  | Bond distance, Å | WBI    |
|-------|------------------|--------|
| Ta-P2 | 2.6433           | 0.8549 |
| Ta-P3 | 2.6324           | 0.8705 |
| Ta-P4 | 2.6802           | 0.7648 |
| P2-P3 | 2.2129           | 1.0064 |
| P2-P4 | 2.1954           | 1.0029 |
| P3-P4 | 2.1951           | 1.0137 |

Usually for the single bonds (bond order one) WBI value is slightly less than 1.0. WBI slightly larger than 1.0 may indicate small additional stabilization compared to the single bond.

Wiberg bond index matrix in the NAO basis:

| Atom  | 1      | 2      | 3      | 4      | 5      | 6      | 7      | 8      | 9      |
|-------|--------|--------|--------|--------|--------|--------|--------|--------|--------|
| 1. Ta | 0.0000 | 0.8549 | 0.8705 | 0.7648 | 0.1125 | 0.1211 | 0.2602 | 0.3323 | 0.0113 |
| 2. P  | 0.8549 | 0.0000 | 1.0064 | 1.0029 | 0.0123 | 0.0303 | 0.0378 | 0.0044 | 0.0004 |
| 3. P  | 0.8705 | 1.0064 | 0.0000 | 1.0137 | 0.0326 | 0.0085 | 0.0051 | 0.0113 | 0.0009 |
| 4. P  | 0.7648 | 1.0029 | 1.0137 | 0.0000 | 0.0299 | 0.0383 | 0.0113 | 0.0110 | 0.0003 |
| 5. O  | 0.1125 | 0.0123 | 0.0326 | 0.0299 | 0.0000 | 0.0175 | 0.0015 | 0.0078 | 0.0001 |
| 6. O  | 0.1211 | 0.0303 | 0.0085 | 0.0383 | 0.0175 | 0.0000 | 0.0033 | 0.0029 | 0.0003 |
| 7. C  | 0.2602 | 0.0378 | 0.0051 | 0.0113 | 0.0015 | 0.0033 | 0.0000 | 1.2641 | 0.0051 |
| 8. C  | 0.3323 | 0.0044 | 0.0113 | 0.0110 | 0.0078 | 0.0029 | 1.2641 | 0.0000 | 0.8891 |
| 9. H  | 0.0113 | 0.0004 | 0.0009 | 0.0003 | 0.0001 | 0.0003 | 0.0051 | 0.8891 | 0.0000 |
| 10. C | 0.3296 | 0.0103 | 0.0101 | 0.0093 | 0.0088 | 0.0102 | 0.0399 | 1.2286 | 0.0049 |
| 11. C | 1.2928 | 0.0570 | 0.0265 | 0.0928 | 0.0340 | 1.9502 | 0.0106 | 0.0056 | 0.0006 |
| 12. C | 0.2914 | 0.0032 | 0.0390 | 0.0108 | 0.0040 | 0.0010 | 1.2763 | 0.0369 | 0.0101 |
| 13. H | 0.0118 | 0.0002 | 0.0009 | 0.0006 | 0.0003 | 0.0001 | 0.0050 | 0.0101 | 0.0003 |
| 14. C | 0.0120 | 0.0013 | 0.0005 | 0.0009 | 0.0001 | 0.0002 | 0.9825 | 0.0135 | 0.0008 |
| 15. C | 0.3425 | 0.0143 | 0.0059 | 0.0093 | 0.0047 | 0.0097 | 0.0395 | 0.0354 | 0.0100 |
| 16. H | 0.0129 | 0.0009 | 0.0010 | 0.0005 | 0.0005 | 0.0002 | 0.0084 | 0.0098 | 0.0003 |
| 17. C | 0.0137 | 0.0011 | 0.0006 | 0.0007 | 0.0004 | 0.0004 | 0.0072 | 0.0137 | 0.0008 |
| 18. C | 0.0028 | 0.0034 | 0.0013 | 0.0018 | 0.0001 | 0.0002 | 0.0115 | 0.0032 | 0.0006 |
| 19. H | 0.0002 | 0.0002 | 0.0001 | 0.0001 | 0.0000 | 0.0000 | 0.0009 | 0.0006 | 0.0008 |
| 20. H | 0.0023 | 0.0064 | 0.0010 | 0.0009 | 0.0001 | 0.0002 | 0.0008 | 0.0002 | 0.0000 |
| 21. H | 0.0007 | 0.0003 | 0.0001 | 0.0001 | 0.0000 | 0.0000 | 0.0117 | 0.0005 | 0.0001 |
| 22. C | 1.2629 | 0.0320 | 0.0595 | 0.0663 | 1.9784 | 0.0348 | 0.0056 | 0.0190 | 0.0003 |

## SUPPORTING INFORMATION

|     |   |        |        |        |        |        |        |        |        |        |
|-----|---|--------|--------|--------|--------|--------|--------|--------|--------|--------|
| 23. | C | 0.0016 | 0.0028 | 0.0012 | 0.0042 | 0.0001 | 0.0001 | 0.0111 | 0.0090 | 0.0003 |
| 24. | H | 0.0027 | 0.0082 | 0.0011 | 0.0016 | 0.0002 | 0.0003 | 0.0009 | 0.0003 | 0.0000 |
| 25. | H | 0.0001 | 0.0002 | 0.0001 | 0.0002 | 0.0000 | 0.0000 | 0.0007 | 0.0003 | 0.0000 |
| 26. | H | 0.0005 | 0.0001 | 0.0001 | 0.0002 | 0.0000 | 0.0000 | 0.0115 | 0.0002 | 0.0000 |
| 27. | C | 0.0066 | 0.0028 | 0.0002 | 0.0011 | 0.0001 | 0.0001 | 0.0159 | 0.0074 | 0.0002 |
| 28. | H | 0.0002 | 0.0001 | 0.0001 | 0.0001 | 0.0000 | 0.0000 | 0.0012 | 0.0003 | 0.0000 |
| 29. | H | 0.0001 | 0.0001 | 0.0000 | 0.0001 | 0.0000 | 0.0000 | 0.0011 | 0.0005 | 0.0001 |
| 30. | H | 0.0005 | 0.0004 | 0.0001 | 0.0002 | 0.0000 | 0.0000 | 0.0117 | 0.0012 | 0.0000 |
| 31. | C | 0.0094 | 0.0003 | 0.0003 | 0.0003 | 0.0007 | 0.0007 | 0.0013 | 0.0068 | 0.0002 |
| 32. | H | 0.0002 | 0.0000 | 0.0000 | 0.0000 | 0.0000 | 0.0000 | 0.0001 | 0.0006 | 0.0001 |
| 33. | H | 0.0003 | 0.0000 | 0.0000 | 0.0001 | 0.0000 | 0.0000 | 0.0001 | 0.0003 | 0.0000 |
| 34. | H | 0.0008 | 0.0000 | 0.0000 | 0.0001 | 0.0001 | 0.0001 | 0.0004 | 0.0012 | 0.0000 |
| 35. | C | 0.0015 | 0.0004 | 0.0001 | 0.0002 | 0.0001 | 0.0022 | 0.0006 | 0.0086 | 0.0003 |
| 36. | H | 0.0001 | 0.0000 | 0.0000 | 0.0000 | 0.0000 | 0.0000 | 0.0000 | 0.0003 | 0.0000 |
| 37. | H | 0.0021 | 0.0015 | 0.0001 | 0.0005 | 0.0000 | 0.0025 | 0.0001 | 0.0003 | 0.0000 |
| 38. | H | 0.0004 | 0.0001 | 0.0000 | 0.0000 | 0.0000 | 0.0001 | 0.0004 | 0.0002 | 0.0000 |
| 39. | C | 0.0033 | 0.0002 | 0.0012 | 0.0003 | 0.0007 | 0.0003 | 0.0011 | 0.0028 | 0.0005 |
| 40. | H | 0.0034 | 0.0003 | 0.0010 | 0.0006 | 0.0005 | 0.0002 | 0.0001 | 0.0003 | 0.0000 |
| 41. | H | 0.0003 | 0.0000 | 0.0003 | 0.0000 | 0.0001 | 0.0000 | 0.0002 | 0.0005 | 0.0007 |
| 42. | H | 0.0008 | 0.0000 | 0.0001 | 0.0000 | 0.0001 | 0.0000 | 0.0002 | 0.0004 | 0.0000 |

| Atom | 10 | 11     | 12     | 13     | 14     | 15     | 16     | 17     | 18     |
|------|----|--------|--------|--------|--------|--------|--------|--------|--------|
| 1.   | Ta | 0.3296 | 1.2928 | 0.2914 | 0.0118 | 0.0120 | 0.3425 | 0.0129 | 0.0028 |
| 2.   | P  | 0.0103 | 0.0570 | 0.0032 | 0.0002 | 0.0013 | 0.0143 | 0.0009 | 0.0011 |
| 3.   | P  | 0.0101 | 0.0265 | 0.0390 | 0.0009 | 0.0005 | 0.0059 | 0.0010 | 0.0006 |
| 4.   | P  | 0.0093 | 0.0928 | 0.0108 | 0.0006 | 0.0009 | 0.0093 | 0.0005 | 0.0007 |
| 5.   | O  | 0.0088 | 0.0340 | 0.0040 | 0.0003 | 0.0001 | 0.0047 | 0.0005 | 0.0004 |
| 6.   | O  | 0.0102 | 1.9502 | 0.0010 | 0.0001 | 0.0002 | 0.0097 | 0.0002 | 0.0004 |
| 7.   | C  | 0.0399 | 0.0106 | 1.2763 | 0.0050 | 0.9825 | 0.0395 | 0.0084 | 0.0072 |
| 8.   | C  | 1.2286 | 0.0056 | 0.0369 | 0.0101 | 0.0135 | 0.0354 | 0.0098 | 0.0137 |
| 9.   | H  | 0.0049 | 0.0006 | 0.0101 | 0.0003 | 0.0008 | 0.0100 | 0.0003 | 0.0008 |
| 10.  | C  | 0.0000 | 0.0206 | 0.0387 | 0.0084 | 0.0075 | 1.2295 | 0.0050 | 0.9805 |
| 11.  | C  | 0.0206 | 0.0000 | 0.0048 | 0.0003 | 0.0008 | 0.0215 | 0.0005 | 0.0011 |
| 12.  | C  | 0.0387 | 0.0048 | 0.0000 | 0.8896 | 0.0132 | 1.2645 | 0.0035 | 0.0074 |
| 13.  | H  | 0.0084 | 0.0003 | 0.8896 | 0.0000 | 0.0008 | 0.0034 | 0.0008 | 0.0002 |
| 14.  | C  | 0.0075 | 0.0008 | 0.0132 | 0.0008 | 0.0000 | 0.0077 | 0.0002 | 0.0002 |
| 15.  | C  | 1.2295 | 0.0215 | 1.2645 | 0.0034 | 0.0077 | 0.0000 | 0.8893 | 0.0128 |
| 16.  | H  | 0.0050 | 0.0005 | 0.0035 | 0.0008 | 0.0002 | 0.8893 | 0.0000 | 0.0008 |
| 17.  | C  | 0.9805 | 0.0011 | 0.0074 | 0.0002 | 0.0002 | 0.0128 | 0.0008 | 0.0000 |
| 18.  | C  | 0.0010 | 0.0005 | 0.0094 | 0.0003 | 0.9950 | 0.0007 | 0.0003 | 0.0000 |
| 19.  | H  | 0.0002 | 0.0001 | 0.0003 | 0.0000 | 0.0031 | 0.0000 | 0.0000 | 0.9325 |
| 20.  | H  | 0.0001 | 0.0008 | 0.0002 | 0.0000 | 0.0041 | 0.0001 | 0.0000 | 0.9122 |
| 21.  | H  | 0.0002 | 0.0001 | 0.0003 | 0.0000 | 0.0028 | 0.0005 | 0.0001 | 0.9340 |
| 22.  | C  | 0.0178 | 0.0563 | 0.0104 | 0.0007 | 0.0003 | 0.0081 | 0.0011 | 0.0010 |
| 23.  | C  | 0.0005 | 0.0003 | 0.0030 | 0.0007 | 0.9965 | 0.0009 | 0.0000 | 0.0002 |
| 24.  | H  | 0.0001 | 0.0006 | 0.0002 | 0.0001 | 0.0041 | 0.0001 | 0.0000 | 0.0000 |
| 25.  | H  | 0.0000 | 0.0000 | 0.0007 | 0.0006 | 0.0031 | 0.0002 | 0.0000 | 0.0123 |
| 26.  | H  | 0.0004 | 0.0000 | 0.0005 | 0.0001 | 0.0028 | 0.0002 | 0.0000 | 0.0001 |
| 27.  | C  | 0.0013 | 0.0003 | 0.0077 | 0.0001 | 0.9843 | 0.0015 | 0.0001 | 0.0001 |
| 28.  | H  | 0.0001 | 0.0000 | 0.0004 | 0.0001 | 0.0032 | 0.0001 | 0.0000 | 0.0121 |
| 29.  | H  | 0.0001 | 0.0000 | 0.0003 | 0.0000 | 0.0032 | 0.0001 | 0.0000 | 0.0007 |
| 30.  | H  | 0.0005 | 0.0000 | 0.0010 | 0.0000 | 0.0030 | 0.0006 | 0.0000 | 0.0000 |
| 31.  | C  | 0.0153 | 0.0010 | 0.0015 | 0.0001 | 0.0001 | 0.0066 | 0.0002 | 0.9840 |
| 32.  | H  | 0.0010 | 0.0001 | 0.0001 | 0.0000 | 0.0000 | 0.0002 | 0.0000 | 0.0032 |
| 33.  | H  | 0.0012 | 0.0001 | 0.0001 | 0.0000 | 0.0000 | 0.0004 | 0.0001 | 0.0032 |
| 34.  | H  | 0.0117 | 0.0002 | 0.0006 | 0.0000 | 0.0000 | 0.0007 | 0.0000 | 0.0029 |
| 35.  | C  | 0.0112 | 0.0011 | 0.0008 | 0.0000 | 0.0003 | 0.0027 | 0.0007 | 0.9974 |
| 36.  | H  | 0.0007 | 0.0001 | 0.0002 | 0.0000 | 0.0000 | 0.0007 | 0.0005 | 0.0032 |
| 37.  | H  | 0.0008 | 0.0020 | 0.0001 | 0.0000 | 0.0000 | 0.0003 | 0.0001 | 0.0041 |
| 38.  | H  | 0.0115 | 0.0001 | 0.0002 | 0.0000 | 0.0001 | 0.0005 | 0.0001 | 0.0029 |
| 39.  | C  | 0.0118 | 0.0008 | 0.0006 | 0.0003 | 0.0000 | 0.0094 | 0.0002 | 0.9947 |
| 40.  | H  | 0.0007 | 0.0003 | 0.0001 | 0.0000 | 0.0000 | 0.0004 | 0.0000 | 0.0041 |
| 41.  | H  | 0.0010 | 0.0000 | 0.0000 | 0.0000 | 0.0000 | 0.0003 | 0.0000 | 0.0032 |
| 42.  | H  | 0.0119 | 0.0001 | 0.0005 | 0.0001 | 0.0000 | 0.0003 | 0.0000 | 0.0027 |

| Atom | 19 | 20     | 21     | 22     | 23     | 24     | 25     | 26     | 27     |
|------|----|--------|--------|--------|--------|--------|--------|--------|--------|
| 1.   | Ta | 0.0002 | 0.0023 | 0.0007 | 1.2629 | 0.0016 | 0.0027 | 0.0001 | 0.0005 |
| 2.   | P  | 0.0002 | 0.0064 | 0.0003 | 0.0320 | 0.0028 | 0.0082 | 0.0002 | 0.0001 |
| 3.   | P  | 0.0001 | 0.0010 | 0.0001 | 0.0595 | 0.0012 | 0.0011 | 0.0001 | 0.0001 |
| 4.   | P  | 0.0001 | 0.0009 | 0.0001 | 0.0663 | 0.0042 | 0.0016 | 0.0002 | 0.0002 |
| 5.   | O  | 0.0000 | 0.0001 | 0.0000 | 1.9784 | 0.0001 | 0.0002 | 0.0000 | 0.0000 |
| 6.   | O  | 0.0000 | 0.0002 | 0.0000 | 0.0348 | 0.0001 | 0.0003 | 0.0000 | 0.0000 |
| 7.   | C  | 0.0009 | 0.0008 | 0.0117 | 0.0056 | 0.0111 | 0.0009 | 0.0007 | 0.0115 |
| 8.   | C  | 0.0006 | 0.0002 | 0.0005 | 0.0190 | 0.0090 | 0.0003 | 0.0003 | 0.0002 |
| 9.   | H  | 0.0008 | 0.0000 | 0.0001 | 0.0003 | 0.0003 | 0.0000 | 0.0000 | 0.0002 |

## SUPPORTING INFORMATION

|     |   |        |        |        |        |        |        |        |        |        |
|-----|---|--------|--------|--------|--------|--------|--------|--------|--------|--------|
| 10. | C | 0.0002 | 0.0001 | 0.0002 | 0.0178 | 0.0005 | 0.0001 | 0.0000 | 0.0004 | 0.0013 |
| 11. | C | 0.0001 | 0.0008 | 0.0001 | 0.0563 | 0.0003 | 0.0006 | 0.0000 | 0.0000 | 0.0003 |
| 12. | C | 0.0003 | 0.0002 | 0.0003 | 0.0104 | 0.0030 | 0.0002 | 0.0007 | 0.0005 | 0.0077 |
| 13. | H | 0.0000 | 0.0000 | 0.0000 | 0.0007 | 0.0007 | 0.0001 | 0.0006 | 0.0001 | 0.0001 |
| 14. | C | 0.0031 | 0.0041 | 0.0028 | 0.0003 | 0.9965 | 0.0041 | 0.0031 | 0.0028 | 0.9843 |
| 15. | C | 0.0000 | 0.0001 | 0.0005 | 0.0081 | 0.0009 | 0.0001 | 0.0002 | 0.0002 | 0.0015 |
| 16. | H | 0.0000 | 0.0000 | 0.0001 | 0.0011 | 0.0000 | 0.0000 | 0.0000 | 0.0000 | 0.0001 |
| 17. | C | 0.0000 | 0.0000 | 0.0000 | 0.0010 | 0.0002 | 0.0000 | 0.0000 | 0.0001 | 0.0001 |
| 18. | C | 0.9325 | 0.9122 | 0.9340 | 0.0004 | 0.0099 | 0.0006 | 0.0123 | 0.0010 | 0.0097 |
| 19. | H | 0.0000 | 0.0012 | 0.0006 | 0.0000 | 0.0122 | 0.0002 | 0.0011 | 0.0003 | 0.0008 |
| 20. | H | 0.0012 | 0.0000 | 0.0010 | 0.0003 | 0.0008 | 0.0002 | 0.0002 | 0.0000 | 0.0110 |
| 21. | H | 0.0006 | 0.0010 | 0.0000 | 0.0000 | 0.0009 | 0.0000 | 0.0002 | 0.0005 | 0.0009 |
| 22. | C | 0.0000 | 0.0003 | 0.0000 | 0.0000 | 0.0002 | 0.0002 | 0.0000 | 0.0000 | 0.0002 |
| 23. | C | 0.0122 | 0.0008 | 0.0009 | 0.0002 | 0.0000 | 0.9116 | 0.9323 | 0.9337 | 0.0097 |
| 24. | H | 0.0002 | 0.0002 | 0.0000 | 0.0002 | 0.9116 | 0.0000 | 0.0011 | 0.0010 | 0.0107 |
| 25. | H | 0.0011 | 0.0002 | 0.0002 | 0.0000 | 0.9323 | 0.0011 | 0.0000 | 0.0006 | 0.0010 |
| 26. | H | 0.0003 | 0.0000 | 0.0005 | 0.0000 | 0.9337 | 0.0010 | 0.0006 | 0.0000 | 0.0008 |
| 27. | C | 0.0008 | 0.0110 | 0.0009 | 0.0002 | 0.0097 | 0.0107 | 0.0010 | 0.0008 | 0.0000 |
| 28. | H | 0.0002 | 0.0010 | 0.0002 | 0.0000 | 0.0006 | 0.0002 | 0.0004 | 0.0000 | 0.9305 |
| 29. | H | 0.0003 | 0.0002 | 0.0000 | 0.0000 | 0.0120 | 0.0010 | 0.0002 | 0.0002 | 0.9311 |
| 30. | H | 0.0000 | 0.0002 | 0.0004 | 0.0000 | 0.0008 | 0.0002 | 0.0000 | 0.0004 | 0.9325 |
| 31. | C | 0.0000 | 0.0000 | 0.0000 | 0.0010 | 0.0000 | 0.0000 | 0.0000 | 0.0000 | 0.0001 |
| 32. | H | 0.0000 | 0.0000 | 0.0000 | 0.0000 | 0.0000 | 0.0000 | 0.0000 | 0.0000 | 0.0000 |
| 33. | H | 0.0000 | 0.0000 | 0.0000 | 0.0000 | 0.0000 | 0.0000 | 0.0000 | 0.0000 | 0.0000 |
| 34. | H | 0.0000 | 0.0000 | 0.0000 | 0.0002 | 0.0000 | 0.0000 | 0.0000 | 0.0000 | 0.0000 |
| 35. | C | 0.0000 | 0.0000 | 0.0000 | 0.0002 | 0.0000 | 0.0000 | 0.0000 | 0.0000 | 0.0000 |
| 36. | H | 0.0000 | 0.0000 | 0.0000 | 0.0000 | 0.0000 | 0.0000 | 0.0000 | 0.0000 | 0.0000 |
| 37. | H | 0.0000 | 0.0000 | 0.0000 | 0.0001 | 0.0000 | 0.0000 | 0.0000 | 0.0000 | 0.0000 |
| 38. | H | 0.0000 | 0.0000 | 0.0000 | 0.0000 | 0.0000 | 0.0000 | 0.0000 | 0.0000 | 0.0000 |
| 39. | C | 0.0000 | 0.0000 | 0.0000 | 0.0013 | 0.0000 | 0.0000 | 0.0000 | 0.0000 | 0.0000 |
| 40. | H | 0.0000 | 0.0000 | 0.0000 | 0.0013 | 0.0000 | 0.0000 | 0.0000 | 0.0000 | 0.0000 |
| 41. | H | 0.0000 | 0.0000 | 0.0000 | 0.0002 | 0.0000 | 0.0000 | 0.0000 | 0.0000 | 0.0000 |
| 42. | H | 0.0000 | 0.0000 | 0.0000 | 0.0002 | 0.0000 | 0.0000 | 0.0000 | 0.0000 | 0.0000 |

| Atom | 28 | 29     | 30     | 31     | 32     | 33     | 34     | 35     | 36     |        |
|------|----|--------|--------|--------|--------|--------|--------|--------|--------|--------|
| 1.   | Ta | 0.0002 | 0.0001 | 0.0005 | 0.0094 | 0.0002 | 0.0003 | 0.0008 | 0.0015 | 0.0001 |
| 2.   | P  | 0.0001 | 0.0001 | 0.0004 | 0.0003 | 0.0000 | 0.0000 | 0.0000 | 0.0004 | 0.0000 |
| 3.   | P  | 0.0001 | 0.0000 | 0.0001 | 0.0003 | 0.0000 | 0.0000 | 0.0000 | 0.0001 | 0.0000 |
| 4.   | P  | 0.0001 | 0.0001 | 0.0002 | 0.0003 | 0.0000 | 0.0001 | 0.0001 | 0.0002 | 0.0000 |
| 5.   | O  | 0.0000 | 0.0000 | 0.0000 | 0.0007 | 0.0000 | 0.0000 | 0.0001 | 0.0001 | 0.0000 |
| 6.   | O  | 0.0000 | 0.0000 | 0.0000 | 0.0007 | 0.0000 | 0.0000 | 0.0001 | 0.0022 | 0.0000 |
| 7.   | C  | 0.0012 | 0.0011 | 0.0117 | 0.0013 | 0.0001 | 0.0001 | 0.0004 | 0.0006 | 0.0000 |
| 8.   | C  | 0.0003 | 0.0005 | 0.0012 | 0.0068 | 0.0006 | 0.0003 | 0.0012 | 0.0086 | 0.0003 |
| 9.   | H  | 0.0000 | 0.0001 | 0.0000 | 0.0002 | 0.0001 | 0.0000 | 0.0000 | 0.0003 | 0.0000 |
| 10.  | C  | 0.0001 | 0.0001 | 0.0005 | 0.0153 | 0.0010 | 0.0012 | 0.0117 | 0.0112 | 0.0007 |
| 11.  | C  | 0.0000 | 0.0000 | 0.0000 | 0.0010 | 0.0001 | 0.0001 | 0.0002 | 0.0011 | 0.0001 |
| 12.  | C  | 0.0004 | 0.0003 | 0.0010 | 0.0015 | 0.0001 | 0.0001 | 0.0006 | 0.0008 | 0.0002 |
| 13.  | H  | 0.0001 | 0.0000 | 0.0000 | 0.0001 | 0.0000 | 0.0000 | 0.0000 | 0.0000 | 0.0000 |
| 14.  | C  | 0.0032 | 0.0032 | 0.0030 | 0.0001 | 0.0000 | 0.0000 | 0.0000 | 0.0003 | 0.0000 |
| 15.  | C  | 0.0001 | 0.0001 | 0.0006 | 0.0066 | 0.0002 | 0.0004 | 0.0007 | 0.0027 | 0.0007 |
| 16.  | H  | 0.0000 | 0.0000 | 0.0000 | 0.0002 | 0.0000 | 0.0001 | 0.0000 | 0.0007 | 0.0005 |
| 17.  | C  | 0.0000 | 0.0000 | 0.0000 | 0.9840 | 0.0032 | 0.0032 | 0.0029 | 0.9974 | 0.0032 |
| 18.  | C  | 0.0121 | 0.0007 | 0.0007 | 0.0000 | 0.0000 | 0.0000 | 0.0000 | 0.0000 | 0.0000 |
| 19.  | H  | 0.0002 | 0.0003 | 0.0000 | 0.0000 | 0.0000 | 0.0000 | 0.0000 | 0.0000 | 0.0000 |
| 20.  | H  | 0.0010 | 0.0002 | 0.0002 | 0.0000 | 0.0000 | 0.0000 | 0.0000 | 0.0000 | 0.0000 |
| 21.  | H  | 0.0002 | 0.0000 | 0.0004 | 0.0000 | 0.0000 | 0.0000 | 0.0000 | 0.0000 | 0.0000 |
| 22.  | C  | 0.0000 | 0.0000 | 0.0000 | 0.0010 | 0.0000 | 0.0000 | 0.0002 | 0.0002 | 0.0000 |
| 23.  | C  | 0.0006 | 0.0120 | 0.0008 | 0.0000 | 0.0000 | 0.0000 | 0.0000 | 0.0000 | 0.0000 |
| 24.  | H  | 0.0002 | 0.0010 | 0.0002 | 0.0000 | 0.0000 | 0.0000 | 0.0000 | 0.0000 | 0.0000 |
| 25.  | H  | 0.0004 | 0.0002 | 0.0000 | 0.0000 | 0.0000 | 0.0000 | 0.0000 | 0.0000 | 0.0000 |
| 26.  | H  | 0.0000 | 0.0002 | 0.0004 | 0.0000 | 0.0000 | 0.0000 | 0.0000 | 0.0000 | 0.0000 |
| 27.  | C  | 0.9305 | 0.9311 | 0.9325 | 0.0001 | 0.0000 | 0.0000 | 0.0000 | 0.0000 | 0.0000 |
| 28.  | H  | 0.0000 | 0.0006 | 0.0005 | 0.0000 | 0.0000 | 0.0000 | 0.0000 | 0.0000 | 0.0000 |
| 29.  | H  | 0.0006 | 0.0000 | 0.0005 | 0.0000 | 0.0001 | 0.0000 | 0.0000 | 0.0000 | 0.0000 |
| 30.  | H  | 0.0005 | 0.0005 | 0.0000 | 0.0000 | 0.0000 | 0.0000 | 0.0000 | 0.0000 | 0.0000 |
| 31.  | C  | 0.0000 | 0.0000 | 0.0000 | 0.0000 | 0.9310 | 0.9303 | 0.9331 | 0.0095 | 0.0009 |
| 32.  | H  | 0.0000 | 0.0001 | 0.0000 | 0.9310 | 0.0000 | 0.0006 | 0.0005 | 0.0118 | 0.0002 |
| 33.  | H  | 0.0000 | 0.0000 | 0.0000 | 0.9303 | 0.0006 | 0.0000 | 0.0005 | 0.0007 | 0.0004 |
| 34.  | H  | 0.0000 | 0.0000 | 0.0000 | 0.9331 | 0.0005 | 0.0005 | 0.0000 | 0.0008 | 0.0000 |
| 35.  | C  | 0.0000 | 0.0000 | 0.0000 | 0.0095 | 0.0118 | 0.0007 | 0.0008 | 0.0000 | 0.9318 |
| 36.  | H  | 0.0000 | 0.0000 | 0.0000 | 0.0009 | 0.0002 | 0.0004 | 0.0000 | 0.9318 | 0.0000 |
| 37.  | H  | 0.0000 | 0.0000 | 0.0000 | 0.0111 | 0.0010 | 0.0002 | 0.0002 | 0.9181 | 0.0011 |
| 38.  | H  | 0.0000 | 0.0000 | 0.0000 | 0.0008 | 0.0002 | 0.0000 | 0.0004 | 0.9333 | 0.0006 |
| 39.  | C  | 0.0000 | 0.0000 | 0.0000 | 0.0096 | 0.0007 | 0.0120 | 0.0006 | 0.0100 | 0.0123 |
| 40.  | H  | 0.0000 | 0.0000 | 0.0000 | 0.0114 | 0.0002 | 0.0010 | 0.0002 | 0.0010 | 0.0003 |
| 41.  | H  | 0.0000 | 0.0000 | 0.0000 | 0.0007 | 0.0003 | 0.0001 | 0.0000 | 0.0121 | 0.0011 |



## SUPPORTING INFORMATION

|     | 42.  | H      | 0.0000 | 0.0000 | 0.0000 | 0.0010 | 0.0000 | 0.0003 | 0.0004 | 0.0008 | 0.0002 |
|-----|------|--------|--------|--------|--------|--------|--------|--------|--------|--------|--------|
|     | Atom |        | 37     | 38     | 39     | 40     | 41     | 42     |        |        |        |
| 1.  | Ta   | 0.0021 | 0.0004 | 0.0033 | 0.0034 | 0.0003 | 0.0008 |        |        |        |        |
| 2.  | P    | 0.0015 | 0.0001 | 0.0002 | 0.0003 | 0.0000 | 0.0000 |        |        |        |        |
| 3.  | P    | 0.0001 | 0.0000 | 0.0012 | 0.0010 | 0.0003 | 0.0001 |        |        |        |        |
| 4.  | P    | 0.0005 | 0.0000 | 0.0003 | 0.0006 | 0.0000 | 0.0000 |        |        |        |        |
| 5.  | O    | 0.0000 | 0.0000 | 0.0007 | 0.0005 | 0.0001 | 0.0001 |        |        |        |        |
| 6.  | O    | 0.0025 | 0.0001 | 0.0003 | 0.0002 | 0.0000 | 0.0000 |        |        |        |        |
| 7.  | C    | 0.0001 | 0.0004 | 0.0011 | 0.0001 | 0.0002 | 0.0002 |        |        |        |        |
| 8.  | C    | 0.0003 | 0.0002 | 0.0028 | 0.0003 | 0.0005 | 0.0004 |        |        |        |        |
| 9.  | H    | 0.0000 | 0.0000 | 0.0005 | 0.0000 | 0.0007 | 0.0000 |        |        |        |        |
| 10. | C    | 0.0008 | 0.0115 | 0.0118 | 0.0007 | 0.0010 | 0.0119 |        |        |        |        |
| 11. | C    | 0.0020 | 0.0001 | 0.0008 | 0.0003 | 0.0000 | 0.0001 |        |        |        |        |
| 12. | C    | 0.0001 | 0.0002 | 0.0006 | 0.0001 | 0.0000 | 0.0005 |        |        |        |        |
| 13. | H    | 0.0000 | 0.0000 | 0.0003 | 0.0000 | 0.0000 | 0.0001 |        |        |        |        |
| 14. | C    | 0.0000 | 0.0001 | 0.0000 | 0.0000 | 0.0000 | 0.0000 |        |        |        |        |
| 15. | C    | 0.0003 | 0.0005 | 0.0094 | 0.0004 | 0.0003 | 0.0003 |        |        |        |        |
| 16. | H    | 0.0001 | 0.0001 | 0.0002 | 0.0000 | 0.0000 | 0.0000 |        |        |        |        |
| 17. | C    | 0.0041 | 0.0029 | 0.9947 | 0.0041 | 0.0032 | 0.0027 |        |        |        |        |
| 18. | C    | 0.0000 | 0.0000 | 0.0000 | 0.0000 | 0.0000 | 0.0000 |        |        |        |        |
| 19. | H    | 0.0000 | 0.0000 | 0.0000 | 0.0000 | 0.0000 | 0.0000 |        |        |        |        |
| 20. | H    | 0.0000 | 0.0000 | 0.0000 | 0.0000 | 0.0000 | 0.0000 |        |        |        |        |
| 21. | H    | 0.0000 | 0.0000 | 0.0000 | 0.0000 | 0.0000 | 0.0000 |        |        |        |        |
| 22. | C    | 0.0001 | 0.0000 | 0.0013 | 0.0013 | 0.0002 | 0.0002 |        |        |        |        |
| 23. | C    | 0.0000 | 0.0000 | 0.0000 | 0.0000 | 0.0000 | 0.0000 |        |        |        |        |
| 24. | H    | 0.0000 | 0.0000 | 0.0000 | 0.0000 | 0.0000 | 0.0000 |        |        |        |        |
| 25. | H    | 0.0000 | 0.0000 | 0.0000 | 0.0000 | 0.0000 | 0.0000 |        |        |        |        |
| 26. | H    | 0.0000 | 0.0000 | 0.0000 | 0.0000 | 0.0000 | 0.0000 |        |        |        |        |
| 27. | C    | 0.0000 | 0.0000 | 0.0000 | 0.0000 | 0.0000 | 0.0000 |        |        |        |        |
| 28. | H    | 0.0000 | 0.0000 | 0.0000 | 0.0000 | 0.0000 | 0.0000 |        |        |        |        |
| 29. | H    | 0.0000 | 0.0000 | 0.0000 | 0.0000 | 0.0000 | 0.0000 |        |        |        |        |
| 30. | H    | 0.0000 | 0.0000 | 0.0000 | 0.0000 | 0.0000 | 0.0000 |        |        |        |        |
| 31. | C    | 0.0111 | 0.0008 | 0.0096 | 0.0114 | 0.0007 | 0.0010 |        |        |        |        |
| 32. | H    | 0.0010 | 0.0002 | 0.0007 | 0.0002 | 0.0003 | 0.0000 |        |        |        |        |
| 33. | H    | 0.0002 | 0.0000 | 0.0120 | 0.0010 | 0.0001 | 0.0003 |        |        |        |        |
| 34. | H    | 0.0002 | 0.0004 | 0.0006 | 0.0002 | 0.0000 | 0.0004 |        |        |        |        |
| 35. | C    | 0.9181 | 0.9333 | 0.0100 | 0.0010 | 0.0121 | 0.0008 |        |        |        |        |
| 36. | H    | 0.0011 | 0.0006 | 0.0123 | 0.0003 | 0.0011 | 0.0002 |        |        |        |        |
| 37. | H    | 0.0000 | 0.0010 | 0.0006 | 0.0002 | 0.0001 | 0.0000 |        |        |        |        |
| 38. | H    | 0.0010 | 0.0000 | 0.0010 | 0.0000 | 0.0003 | 0.0005 |        |        |        |        |
| 39. | C    | 0.0006 | 0.0010 | 0.0000 | 0.9205 | 0.9307 | 0.9339 |        |        |        |        |
| 40. | H    | 0.0002 | 0.0000 | 0.9205 | 0.0000 | 0.0013 | 0.0009 |        |        |        |        |
| 41. | H    | 0.0001 | 0.0003 | 0.9307 | 0.0013 | 0.0000 | 0.0006 |        |        |        |        |
| 42. | H    | 0.0000 | 0.0005 | 0.9339 | 0.0009 | 0.0006 | 0.0000 |        |        |        |        |

Wiberg bond index, Totals by atom:

| Atom | 1  |        |
|------|----|--------|
| 1.   | Ta | 6.9386 |
| 2.   | P  | 3.0977 |
| 3.   | P  | 3.1015 |
| 4.   | P  | 3.0761 |
| 5.   | O  | 2.2486 |
| 6.   | O  | 2.2365 |
| 7.   | C  | 4.0470 |
| 8.   | C  | 3.9413 |
| 9.   | H  | 0.9398 |
| 10.  | C  | 4.0427 |
| 11.  | C  | 3.5848 |
| 12.  | C  | 3.9334 |
| 13.  | H  | 0.9361 |
| 14.  | C  | 4.0484 |
| 15.  | C  | 3.9353 |
| 16.  | H  | 0.9382 |
| 17.  | C  | 4.0488 |
| 18.  | C  | 3.8584 |
| 19.  | H  | 0.9558 |
| 20.  | H  | 0.9456 |
| 21.  | H  | 0.9561 |
| 22.  | C  | 3.5607 |
| 23.  | C  | 3.8573 |
| 24.  | H  | 0.9476 |
| 25.  | H  | 0.9557 |

SUPPORTING INFORMATION

---

|     |   |        |
|-----|---|--------|
| 26. | H | 0.9553 |
| 27. | C | 3.8687 |
| 28. | H | 0.9521 |
| 29. | H | 0.9527 |
| 30. | H | 0.9556 |
| 31. | C | 3.8691 |
| 32. | H | 0.9526 |
| 33. | H | 0.9521 |
| 34. | H | 0.9560 |
| 35. | C | 3.8583 |
| 36. | H | 0.9549 |
| 37. | H | 0.9483 |
| 38. | H | 0.9547 |
| 39. | C | 3.8618 |
| 40. | H | 0.9502 |
| 41. | H | 0.9544 |
| 42. | H | 0.9562 |

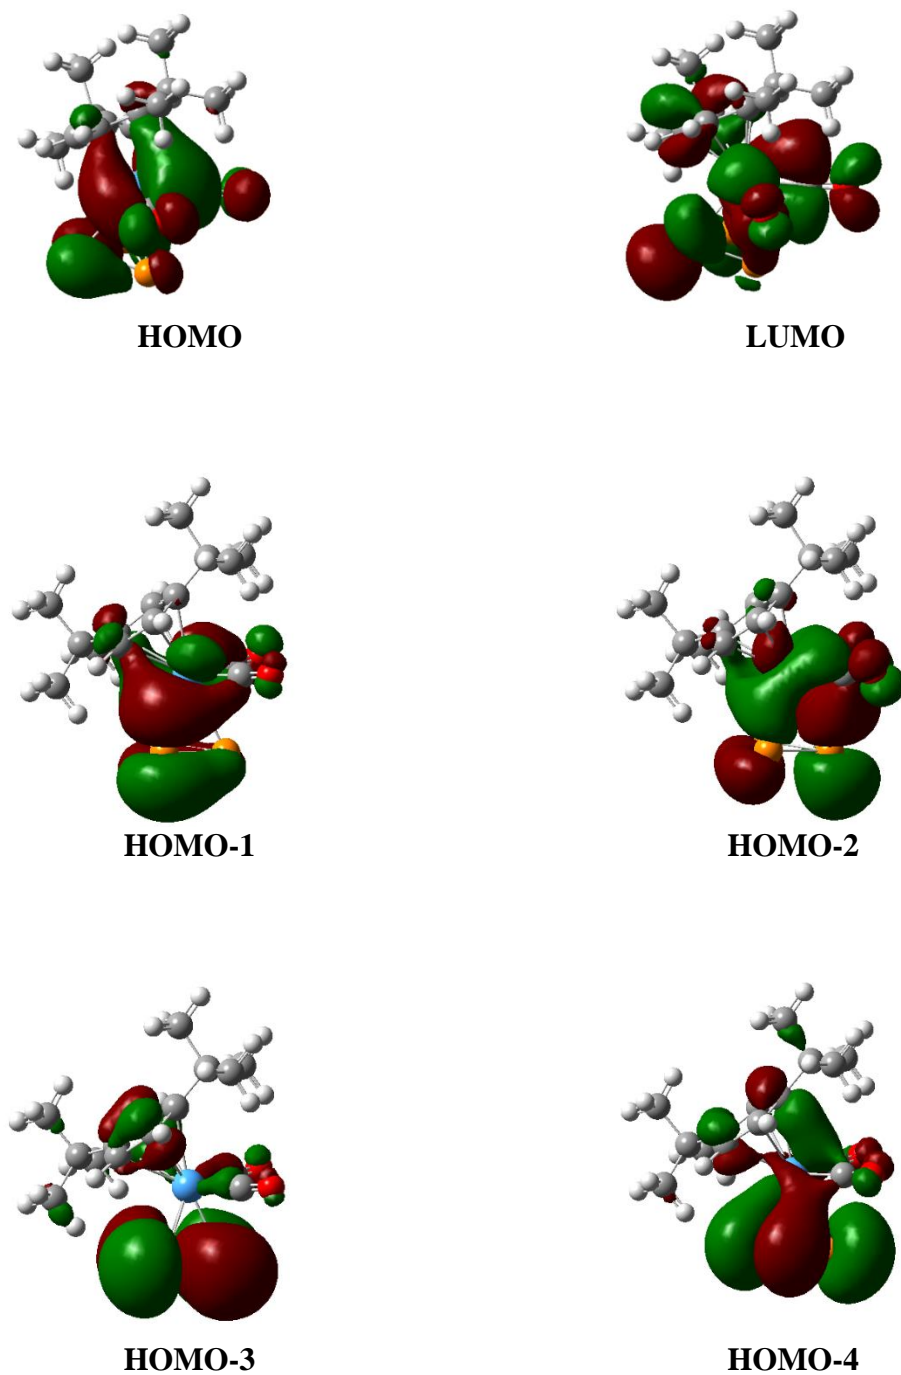

**Figure S 11.** HOMO and LUMO and other selected MOs of the anion of **6** ( $= [\text{Cp}^*\text{Ta}(\text{CO})_2(\eta^3\text{-P}_3)]^-$ ). B3LYP/def2-SVPD level of theory.

## 5. References

- [1] O. J. Scherer, T. Brück, *Angew. Chem. Int. Ed.* **1987**, *26*, 59-59.
- [2] O. J. Scherer, R. Winter, G. Wolmershäuser, *Z. Anorg. Allg. Chem.* **1993**, *619*, 827-835.
- [3] N. Kuhn, T. Kratz, *Synthesis* **1993**, *6*, 561-562.
- [4] A. J. Arduengo III, H. C. R. Dias, R. L. Harlow, M. Kline, *J. Am. Chem. Soc.* **1992**, *114*, 5530-5534.
- [5] A. J. Arduengo III, R. Krafczyk, R. Schmutzler, H. A. Craig, G. Jens R, W. J. Marshall, M. Unverzagt, *Tetrahedron* **1999**, *55*, 14523-14536.
- [6] J. W. Runyon, O. Steinhof, H. V. R. Dias, J. C. Calabrese, W. J. Marshall, A. J. Arduengo, *Aust. J. Chem.* **2011**, *64*, 1165-1172.
- [7] K. Powers, C. Hering-Junghans, R. McDonald, M. J. Ferguson, E. Rivard, *Polyhedron* **2016**, *108*, 8-14.
- [8] CrysAlisPro Software System, Rigaku Oxford Diffraction, (**2018**).
- [9] a) L. J. Bourhis, O. V. Dolomanov, R. J. Gildea, J. A. K. Howard, H. Puschmann, The Anatomy of a Comprehensive Constrained, Restrained, Refinement Program for the Modern Computing Environment - **Olex2** Disected, *Acta Cryst. A* **2015**, *A71*, 59-71; b) O. V. Dolomanov, L. J. Bourhis, R. J. Gildea, J. A. K. Howard, H. Puschmann, **Olex2**: A complete structure solution, refinement and analysis program, *J. Appl. Cryst.* **2009**, *42*, 339-341.
- [10] G. M. Sheldrick, ShelXT-Integrated space-group and crystal-structure determination, *Acta Cryst.* **2015**, *A71*, 3-8.
- [11] G. M. Sheldrick, Crystal structure refinement with ShelXL, *Acta Cryst.* **2015**, *C71*, 3-8.
- [12] a) A. D. Becke, *J. Chem. Phys.* **1993**, *98*, 5648-5652; b) C. Lee, W. Yang, R. G. Parr, *Phys. Rev. B.* **1988**, *37*, 785.
- [13] M. J. Frisch, G. W. Trucks, H. B. Schlegel, G. E. Scuseria, M. A. Robb, J. R. Cheeseman, G. Scalmani, V. Barone, B. Mennucci, G. A. Petersson, H. Nakatsuji, M. Caricato, X. Li, H. P. Hratchian, A. F. Izmaylov, J. Bloino, G. Zheng, J. L. Sonnenberg, M. Hada, M. Ehara, K. Toyota, R. Fukuda, J. Hasegawa, M. Ishida, T. Nakajima, Y. Honda, O. Kitao, H. Nakai, T. Vreven, J. A. Montgomery, Jr., J. E. Peralta, F. Ogliaro, M. Bearpark, J. J. Heyd, E. Brothers, K. N. Kudin, V. N. Staroverov, T. Keith, R. Kobayashi, J. Normand, K. Raghavachari, A. Rendell, J. C. Burant, S. S. Iyengar, J. Tomasi, M. Cossi, N. Rega, J. M. Millam, M. Klene, J. E. Knox, J. B. Cross, V. Bakken, C. Adamo, J. Jaramillo, R. Gomperts, R. E. Stratmann, O. Yazyev, A. J. Austin, R. Cammi, C. Pomelli, J. W. Ochterski, R. L. Martin, K. Morokuma, V. G. Zakrzewski, G. A. Voth, P. Salvador, J. J. Dannenberg, S. Dapprich, A. D. Daniels, O. Farkas, J. B. Foresman, J. V. Ortiz, J. Cioslowski, and D. J. Fox, Gaussian 09, Revision E.01, Gaussian, Inc., Wallingford CT, **2013**.
